# Supplementary material for: Chiral linker-bridged bis-N-heterocyclic carbenes: design, synthesis, palladium complexes, and catalytic properties
Source: Royal Society of Chemistry journal article supplement (doi:10.1039/c6dt00984k), 2016-01-01
Supplement: c6dt00984k1.pdf [file c6dt00984k1.pdf]

*Supporting Information for*

Chiral Linker - Bridged Bis-*N*-Heterocyclic Carbenes: Design,  
Synthesis, Palladium Complexes, and Catalytic Property

Dao Zhang,\* Yu He and Junkai Tang

Department of Chemistry, Fudan University, 220 Handan Road, Shanghai, 200433,  
People's Republic of China

(*R,R*)-**1b**.  $^1\text{H-NMR}$  (400 MHz,  $\text{CDCl}_3$ ):  $\delta$  7.80 (d,  $J = 8.4$  Hz, 2H,  $\text{CH}_{\text{Ar-NO}_2\text{-o}}$ ), 7.27 (d,  $J = 8.0$  Hz, 2H,  $\text{CH}_{\text{Ar-CH}_3\text{-o}}$ ), 6.76 (t,  $J = 7.2$  Hz, 2H), 3.40 (m, 2H, CH), 2.38 (s, 6H,  $\text{CH}_3$ ), 1.98 (m, 2H,  $\text{CH}_2$ ), 1.72 (m, 2H,  $\text{CH}_2$ ), 1.27 (m, 4H,  $\text{CH}_2$ ).  $^{13}\text{C-NMR}$  (100 MHz,  $\text{CDCl}_3$ ):  $\delta$  144.5 ( $\text{C}_{\text{Ar-NH}}$ ), 139.2 ( $\text{CH}_{\text{Ar-CH}_3\text{-o}}$ ), 138.2 ( $\text{C}_{\text{Ar-NO}_2}$ ), 130.2 ( $\text{C}_{\text{Ar-CH}_3}$ ), 124.3 ( $\text{CH}_{\text{Ar-NO}_2\text{-o}}$ ), 119.0 ( $\text{CH}_{\text{Ar-NO}_2\text{-m}}$ ), 61.6 (CH), 33.5 ( $\text{CH}_2$ ), 24.5 ( $\text{CH}_2$ ), 20.9 ( $\text{CH}_3$ ).

(*R,R*)-**1c**.  $^1\text{H-NMR}$  (400 MHz,  $\text{CDCl}_3$ ):  $\delta$  8.05 (dd,  $J = 8.8, 1.6$  Hz, 1H,  $\text{CH}_{\text{Ar-NO}_2\text{-o}}$ ), 7.93 (d,  $J = 7.6$  Hz, 1H,  $\text{CH}_{\text{Ar-NO}_2\text{-o}}$ ), 7.70 (dd,  $J = 8.4, 1.2$  Hz, 1H,  $\text{CH}_{\text{Ar-Me-o}}$ ), 7.38 (m, 1H, CH), 7.31 (d,  $J = 7.6$  Hz, 1H, CH), 6.79 (m, 2H), 6.63 (m, 1H), 3.50 (m, 1H, CH), 3.39 (m, 1H, CH), 2.44 (s, 3H,  $\text{CH}_3$ ), 2.19 (m, 2H,  $\text{CH}_2$ ), 1.84 (m, 2H,  $\text{CH}_2$ ), 1.51-1.30 (m, 4H,  $\text{CH}_2$ ).  $^{13}\text{C-NMR}$  (100 MHz,  $\text{CDCl}_3$ ):  $\delta$  144.6, 140.0 ( $\text{C}_{\text{Ar-NH}}$ ), 138.0, 136.4 ( $\text{CH}_{\text{Ar-NO}_2\text{-p}}$ ), 131.7, 131.1 ( $\text{C}_{\text{Ar-NO}_2}$ ), 127.0 ( $\text{C}_{\text{Ar-CH}_3}$ ), 123.8, 119.7 ( $\text{CH}_{\text{Ar-NO}_2\text{-o}}$ ), 115.4, 113.2 ( $\text{CH}_{\text{Ar-NO}_2\text{-m}}$ ), 60.2, 58.7 (CH), 33.5, 32.5 ( $\text{CH}_2$ ), 24.9, 24.4 ( $\text{CH}_2$ ), 20.6 ( $\text{CH}_3$ ).

(*R,R*)-**1d**.  $^1\text{H-NMR}$  (400 MHz,  $\text{CDCl}_3$ ):  $\delta$  8.02 (dd,  $J = 8.4, 1.6$  Hz, 2H,  $\text{CH}_{\text{Ar-NO}_2\text{-o}}$ ), 7.73 (dd,  $J = 8.0, 1.6$  Hz, 2H,  $\text{CH}_{\text{Ar-CF}_3\text{-o}}$ ), 6.98 (d,  $J = 8.8$  Hz, 2H), 6.83 (d,  $J = 8.0$  Hz, 2H, NH), 3.42 (m, 2H, CH), 2.08 (m, 2H,  $\text{CH}_2$ ), 1.76 (m, 2H,  $\text{CH}_2$ ), 1.30 (m, 4H,  $\text{CH}_2$ ).  $^{13}\text{C-NMR}$  (100 MHz,  $\text{CDCl}_3$ ):  $\delta$  142.5 ( $\text{C}_{\text{Ar-NH}}$ ), 138.9 ( $\text{C}_{\text{Ar-NO}_2}$ ), 134.6 ( $\text{CH}_{\text{Ar-CF}_3\text{-o}}$ ), 130.34 ( $\text{CH}_{\text{Ar-NO}_2\text{-o}}$ ), 125.2 ( $\text{CF}_3$ ), 122.5 ( $\text{CH}_{\text{Ar-NO}_2\text{-o}}$ ), 117.1 ( $\text{C}_{\text{Ar-CF}_3}$ ), 62.4 (CH), 33.3 ( $\text{CH}_2$ ), 24.5 ( $\text{CH}_2$ ).

(*R,R*)-**5a**.  $^1\text{H-NMR}$  (400 MHz,  $\text{CDCl}_3$ ):  $\delta$  8.85 (dd,  $J = 4.0$  Hz, 2H,  $\text{CH}_{\text{Ar-NO}_2\text{-o}}$ ), 8.17 (dd,  $J = 7.4, 1.2$  Hz, 2H,  $\text{CH}_{\text{Ar-NO}_2\text{-p}}$ ), 7.33 – 7.30 (m, 6H), 7.19 – 7.16 (m, 4H), 6.68 – 6.63 (m, 4H), 5.03 (t,  $J = 10.0, 4.4$  Hz, 2H).  $^{13}\text{C-NMR}$  (100 MHz,  $\text{CDCl}_3$ ):  $\delta$  143.9 ( $\text{C}_{\text{Ar-NH}}$ ), 137.0 ( $\text{C}_{\text{Ar}}$ ), 136.1 ( $\text{CH}_{\text{Ar-NO}_2\text{-p}}$ ), 132.9 ( $\text{C}_{\text{Ar-NO}_2}$ ), 128.9, 128.6, 127.7 ( $\text{CH}_{\text{Ar}}$ ), 126.8 ( $\text{CH}_{\text{Ar-NO}_2\text{-o}}$ ), 116.5 ( $\text{CH}_{\text{Ar-NH-p}}$ ), 115.1 ( $\text{CH}_{\text{Ar-NH-o}}$ ), 62.3 (CH).

(*R,R*)-**5b**. HRMS (positive ions):  $m/z$  591.1467 (calcd for  $[\text{M}+\text{H}]^+$  591.1448), 385.1150 (calcd for  $\{\text{M}-[\text{2-NO}_2\text{-6-CF}_3(\text{C}_6\text{H}_3)\text{NH}]\}^+$  385.1158).  $^1\text{H-NMR}$  (400 MHz,  $\text{CDCl}_3$ ):  $\delta$  7.91 (dd,  $J = 8.0, 1.6$  Hz, 2H,  $\text{CH}_{\text{Ar-NO}_2\text{-o}}$ ), 7.73 (dd,  $J = 7.6, 1.6$  Hz, 2H,  $\text{CH}_{\text{Ar-CF}_3\text{-o}}$ ), 7.23 (d,  $J = 6.4$  Hz, 2H), 7.06 (m, 6H), 6.84 (m, 6H), 4.98 (m, 2H, CH).  $^{13}\text{C-NMR}$  (100 MHz,  $\text{CDCl}_3$ ):  $\delta$  141.3 ( $\text{C}_{\text{Ph}}$ ), 140.7 ( $\text{C}_{\text{Ar-NH}}$ ), 136.9 ( $\text{C}_{\text{Ar-NO}_2}$ ), 133.3 ( $\text{CH}_{\text{Ar-CF}_3\text{-o}}$ ), 130.3 ( $\text{CH}_{\text{Ar-NO}_2\text{-o}}$ ), 128.5, 128.1, 127.9, 127.7 ( $\text{CH}_{\text{Ar}}$ ), 125.2 ( $\text{CF}_3$ ), 122.5, 121.5, 121.1 ( $\text{CH}_{\text{Ar}}$ ), 118.3 ( $\text{C}_{\text{Ar-CF}_3}$ ), 66.7 (CH).

**(R,R)-3d.**  $^1\text{H-NMR}$  (400 MHz,  $\text{CDCl}_3$ ):  $\delta$  6.98-6.92 (m, 4H,  $\text{CH}_{\text{Ar-NO}_2\text{-o}}$  +  $\text{CH}_{\text{Ar-CF}_3\text{-o}}$ ), 6.86 (m, 2H,  $\text{CH}_{\text{Ar-NH-p}}$ ), 4.65 (br, 6H, NH +  $\text{NH}_2$ ), 3.19 (m, 2H, CH), 2.09 (m, 2H,  $\text{CH}_2$ ), 1.71 (m, 2H,  $\text{CH}_2$ ), 1.30 (m, 2H,  $\text{CH}_2$ ), 1.17 (m, 2H,  $\text{CH}_2$ ).  $^{13}\text{C-NMR}$  (100 MHz,  $\text{CDCl}_3$ ):  $\delta$  142.6 ( $\text{C}_{\text{Ar-NH}_2}$ ), 131.3 ( $\text{C}_{\text{Ar-NH}}$ ), 125.4 ( $\text{CF}_3$ ), 123.1 ( $\text{CH}_{\text{Ar-NH}_2\text{-o}}$ + $\text{CH}_{\text{Ar-NH}_2\text{-m}}$ ), 119.0 ( $\text{CH}_{\text{Ar-CF}_3\text{-o}}$ ), 115.6 ( $\text{C}_{\text{Ar-CF}_3}$ ), 60.0 (CH), 33.7 ( $\text{CH}_2$ ), 25.2 ( $\text{CH}_2$ ).

**(R,R)-6.**  $^1\text{H-NMR}$  (400MHz,  $\text{CDCl}_3$ ):  $\delta$  7.28-7.12(m, 10H, ArH), 6.75-6.62(m, 6H, ArH), 6.44-6.41 (m, 2H, ArH), 4.59(s, 2H, CH), 3.48(s, 6H, NH).  $^{13}\text{C-NMR}$  (100MHz,  $\text{CDCl}_3$ ):  $\delta$  140.07, 136.55, 134.75, 128.29, 127.41, 120.54, 119.07, 116.64, 113.71, 64.48.

**7a.** (1.6 g) HRMS (positive ions):  $m/z$  177.0654 (calcd for  $[\text{M}+\text{H}]^+$  177.0640).  $^1\text{H-NMR}$  (400 MHz,  $\text{CDCl}_3$ ):  $\delta$  7.02 (d,  $J = 8.0$  Hz, 1H), 6.86 (d,  $J = 8.0$  Hz, 1H), 6.72 (t,  $J = 8.0$  Hz, 1H), 3.69 (br, 4H).  $^{13}\text{C-NMR}$  (100 MHz,  $\text{CDCl}_3$ ):  $\delta$  135.1, 133.9, 128.3, 126.4, 123.7, 120.1, 118.5, 117.7.

**7b.** (0.8 g)  $^1\text{H-NMR}$  (400 MHz,  $\text{CDCl}_3$ ):  $\delta$  7.33-7.28 (m, 4H,  $\text{CH}_{\text{Ar}}$ ), 7.23-7.19 (m, 6H,  $\text{CH}_{\text{Ar}}$ ), 2.95 (m, 4H,  $\text{CH}_2$ ).

**(R)-7c.** (60 mg)  $^1\text{H-NMR}$  (400 MHz,  $\text{CDCl}_3$ ):  $\delta$  7.23-7.19 (m, 6H,  $\text{CH}_{\text{Ar}}$ ), 7.05-7.03 (m, 4H,  $\text{CH}_{\text{Ar}}$ ), 6.95 (d,  $J = 7.6$  Hz, 1H), 6.75 (d,  $J = 7.6$  Hz, 1H), 6.66 (t,  $J = 8.0$  Hz, 1H), 4.73 (s, 1H), 4.35 (d,  $J = 7.6$  Hz, 1H), 4.23 (s, 1H), 4.16 (d,  $J = 7.6$  Hz, 1H).  $^{13}\text{C-NMR}$  (100 MHz,  $\text{CDCl}_3$ ):  $\delta$  139.4, 139.3, 134.3, 131.8, 128.4, 128.3, 128.1, 127.9, 127.7, 126.7, 123.4, 116.9, 116.1, 116.0, 62.1, 61.2, 29.7.

**(R,R)-1b.**  $^1\text{H-NMR}$  (400 MHz,  $\text{CDCl}_3$ ):  $\delta$  7.96 (s, 2H,  $\text{CH}_{\text{imidazole}}$ ), 7.52 (d,  $J = 8.0$  Hz, 2H,  $\text{CH}_{\text{Ar-CH}_3\text{-o}}$ ), 7.12 (d,  $J = 7.6$  Hz, 2H,  $\text{CH}_{\text{Ar-CH}_3\text{-m}}$ ), 7.04 (d,  $J = 7.2$  Hz, 2H,  $\text{CH}_{\text{Ar-CH}_3\text{-p}}$ ), 5.35 (dd,  $J = 6.4, 4.0$  Hz, 2H), 2.84 (s, 6H,  $\text{CH}_3$ ), 2.53 (d,  $J = 14.0$  Hz, 2H,  $\text{CH}_2$ ), 2.07 (m, 2H,  $\text{CH}_2$ ), 1.86 (m, 2H,  $\text{CH}_2$ ), 1.69 (m, 2H,  $\text{CH}_2$ ).  $^{13}\text{C-NMR}$  (100 MHz,  $\text{CDCl}_3$ ):  $\delta$  143.7 ( $\text{CH}_{\text{imidazole}}$ ), 139.4 ( $\text{C}_{\text{Ar-CH}_3\text{-m}}$ ), 132.0 ( $\text{C}_{\text{Ar-CH}_3\text{-o}}$ ), 126.5 ( $\text{C}_{\text{Ar-CH}_3}$ ), 122.6 ( $\text{CH}_{\text{Ar-CH}_3\text{-o}}$ ), 120.0 ( $\text{CH}_{\text{Ar-CH}_3\text{-m}}$ ), 118.7 ( $\text{CH}_{\text{Ar-CH}_3\text{-p}}$ ), 58.7 (CH), 37.0 ( $\text{CH}_2$ ), 24.8 ( $\text{CH}_2$ ), 19.3 ( $\text{CH}_3$ ).

**(R,R)-1c.**  $^1\text{H-NMR}$  (400 MHz,  $\text{CDCl}_3$ ):  $\delta$  8.16-8.14 (1H,  $\text{CH}_{\text{imidazole}}$ ), 7.89 (s, 1H,  $\text{CH}_{\text{imidazole}}$ ), 7.63 (d,  $J = 8.0$  Hz, 1H), 7.45 (d,  $J = 8.0$  Hz, 1H), 7.39 (d,  $J = 8.4$  Hz, 1H), 7.23 (td,  $J = 8.0$  Hz, 1.2 Hz, 1H), 7.17 (td,  $J = 8.0, 1.2$  Hz, 1H), 7.01 (t,  $J = 4.4$  Hz, 1H), 6.86 (d,  $J = 7.2$  Hz, 2H), 2.60 (s, 3H,  $\text{CH}_3$ ), 2.50-2.42 (m, 2H,  $\text{CH}_2$ ), 2.21-1.95 (m, 4H,  $\text{CH}_2$ ), 1.72-1.67 (m, 2H,  $\text{CH}_2$ ).  $^{13}\text{C-NMR}$  (100 MHz,  $\text{CDCl}_3$ ):  $\delta$  143.6, 143.5 ( $\text{CH}_{\text{imidazole}}$ ), 140.5, 139.5, 132.8, 132.1, 126.3, 123.2, 122.5, 122.3, 12.7, 120.0,

118.6, 109.4, 59.1 (CH), 36.1, 33.6 (CH<sub>2</sub>), 25.1, 25.0 (CH<sub>2</sub>), 19.3 (CH<sub>3</sub>).

(*R,R*)-**1d**. HRMS (positive ions):  $m/z$  453.1504 (calcd for [M+H]<sup>+</sup> 453.1514). <sup>1</sup>H-NMR (400 MHz, CDCl<sub>3</sub>): δ 8.01 (s, 2H, CH<sub>imidazole</sub>), 7.86 (d,  $J$  = 8.0 Hz, 2H, CH<sub>Ar-CF<sub>3</sub>-o</sub>), 7.67 (d,  $J$  = 7.6 Hz, 2H, CH<sub>Ar-CF<sub>3</sub>-p</sub>), 7.30 (t,  $J$  = 8.0 Hz, 2H, CH<sub>Ar-CF<sub>3</sub>-m</sub>), 5.23 (m, 2H, CH), 2.52 (m, 2H, CH<sub>2</sub>), 2.05 (m, 2H, CH<sub>2</sub>), 1.82 (m, 2H, CH<sub>2</sub>), 1.09 (m, 2H, CH<sub>2</sub>). <sup>13</sup>C-NMR (100 MHz, CDCl<sub>3</sub>): δ 145.3 (CH<sub>imidazole</sub>), 141.3 (C<sub>Ar-CF<sub>3</sub>-m</sub>), 129.3 (C<sub>Ar-CF<sub>3</sub>-o</sub>), 125.7 (CF<sub>3</sub>), 125.5, 123.0, 122.2, 121.8 (CH<sub>Ar</sub>), 113.2 (C<sub>Ar-CF<sub>3</sub></sub>), 59.1 (CH), 36.6 (CH<sub>2</sub>), 25.2 (CH<sub>2</sub>).

(*R,R*)-**1d'**. HRMS (positive ions):  $m/z$  443.1653 (calcd for [M+H]<sup>+</sup> 443.1670). <sup>1</sup>H-NMR (400 MHz, CDCl<sub>3</sub>): δ 8.39 (d,  $J$  = 6.4 Hz, 1H, CH<sub>imidazole</sub>), 8.01 (d,  $J$  = 8.4 Hz, 1H, CH<sub>Ar-CF<sub>3</sub>-o</sub>), 7.67 (d,  $J$  = 7.6 Hz, 1H, CH<sub>Ar-CF<sub>3</sub>-p</sub>), 7.34 (t,  $J$  = 8.0 Hz, 1H, CH<sub>Ar-CF<sub>3</sub>-m</sub>), 6.90 (d,  $J$  = 6.8 Hz, 1H, CH<sub>Ar-NH<sub>2</sub>-p</sub>), 6.85 (t,  $J$  = 8.0 Hz, 1H, CH<sub>Ar-NH<sub>2</sub>-m</sub>), 6.76 (d,  $J$  = 7.6 Hz, 1H, CH<sub>Ar-NH<sub>2</sub>-o</sub>), 4.55 (td,  $J$  = 22.2, 3.6 Hz, 1H, CH), 3.84 (d,  $J$  = 9.6 Hz, 1H, CH), 3.34 (d,  $J$  = 10.4 Hz, 1H), 3.00 (brs, 3H), 2.33 (m, 1H, CH<sub>2</sub>), 1.99-1.81 (m, 4H, CH<sub>2</sub>), 52-1.32 (m, 3H). <sup>13</sup>C-NMR (100 MHz, CDCl<sub>3</sub>): δ 144.9 (CH<sub>imidazole</sub>), 142.4, 142.2 (C<sub>Ar-CF<sub>3</sub>-m</sub>), 130.9 (C<sub>Ar-CF<sub>3</sub>-o</sub>), 126.0 (CF<sub>3</sub>), 125.6, 125.2, 123.8, 123.5, 123.3, 123.1, 122.0, 121.2 (CH<sub>Ar</sub>), 119.6, 116.6 (C<sub>Ar-CF<sub>3</sub></sub>), 60.4, 58.0 (CH), 34.8, 33.6 (CH<sub>2</sub>), 25.7, 24.8 (CH<sub>2</sub>).

(*R,R*)-**1d''**. HRMS (positive ions):  $m/z$  471.1612 (calcd for [M+H]<sup>+</sup> 471.1620). <sup>1</sup>H-NMR (400 MHz, CDCl<sub>3</sub>): δ 8.50 (s, 1H, CH<sub>imidazole</sub>), 8.35 (d,  $J$  = 8.0 Hz, 1H, CH<sub>Ar-CF<sub>3</sub>-o</sub>), 8.05 (d,  $J$  = 8.0 Hz, 1H, CH<sub>Ar-CF<sub>3</sub>-p</sub>), 7.70 (d,  $J$  = 7.6 Hz, 1H, CH<sub>Ar-CF<sub>3</sub>-p</sub>), 7.36 (t,  $J$  = 8.0 Hz, 1H, CH<sub>Ar-CF<sub>3</sub>-m</sub>), 7.22 (s, 1H), 7.12 (t,  $J$  = 8.0 Hz, 1H, CH<sub>Ar-CF<sub>3</sub>-m</sub>), 4.61 (m, 1H), 3.75 (br s, 1H, OH), 3.42 (m, 1H), 3.25 (d,  $J$  = 8.8 Hz, 1H), 2.35 (d,  $J$  = 10.4 Hz, 1H), 1.97-1.75 (m, 6H, CH<sub>2</sub>), 1.53-1.32 (m, 2H, CH<sub>2</sub>). <sup>13</sup>C-NMR (100 MHz, CDCl<sub>3</sub>): δ 159.3, 144.9, 142.0, 133.6, 125.6, 125.5, 125.3, 125.2, 124.5, 122.9, 122.4, 122.2, 121.6, 62.1, 60.7 (CH), 34.2, 32.6 (CH<sub>2</sub>), 25.5, 24.6 (CH<sub>2</sub>).

(*R,R*)-**4**. <sup>1</sup>H-NMR (400 MHz, CDCl<sub>3</sub>): δ 7.88 (s, 2H, CH<sub>Ar</sub>), 6.68-6.66 (m, 2H, CH<sub>Ar</sub>), 7.25 – 7.13 (m, 16H, CH<sub>Ar</sub>), 6.37 (s, 2H, CH). <sup>13</sup>C-NMR (100 MHz, CDCl<sub>3</sub>): δ 143.5 (C<sub>Ar</sub>), 140.1 (CH<sub>imidazole</sub>), 135.4, 133.1 (C<sub>Ar</sub>), 129.1, 127.7, 123.6, 122.8, 120.7, 109.5 (CH<sub>Ar</sub>), 62.5 (CH).

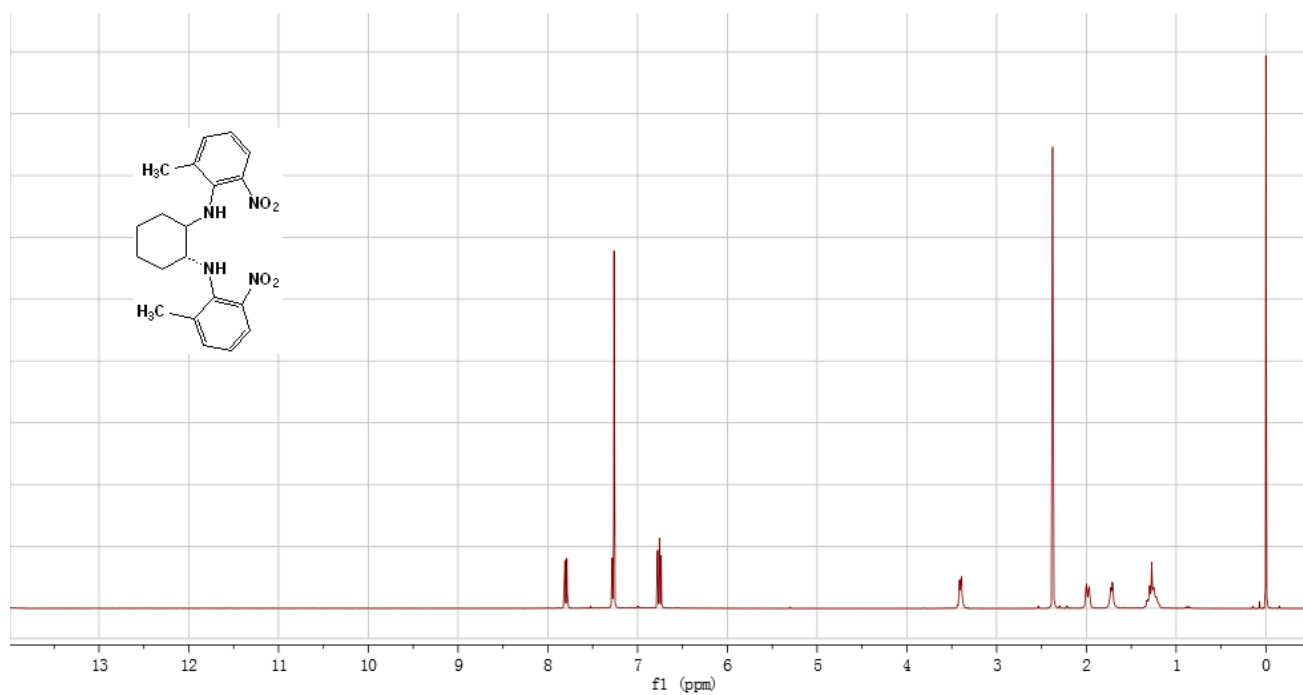

**Figure S1.** The  $^1\text{H}$  NMR spectrum of  $(R,R)$ -**2b** in  $\text{CDCl}_3$  at  $20^\circ\text{C}$

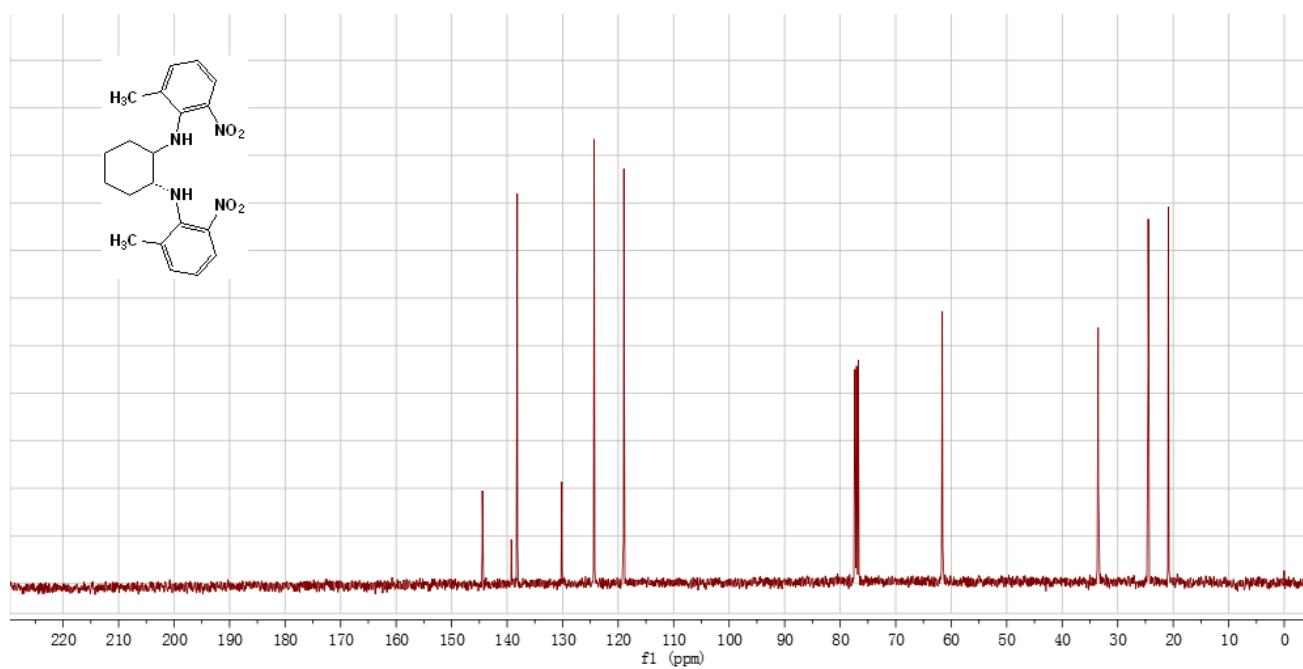

**Figure S2.** The  $^{13}\text{C}$  NMR spectrum of  $(R,R)$ -**2b** in  $\text{CDCl}_3$  at  $20^\circ\text{C}$

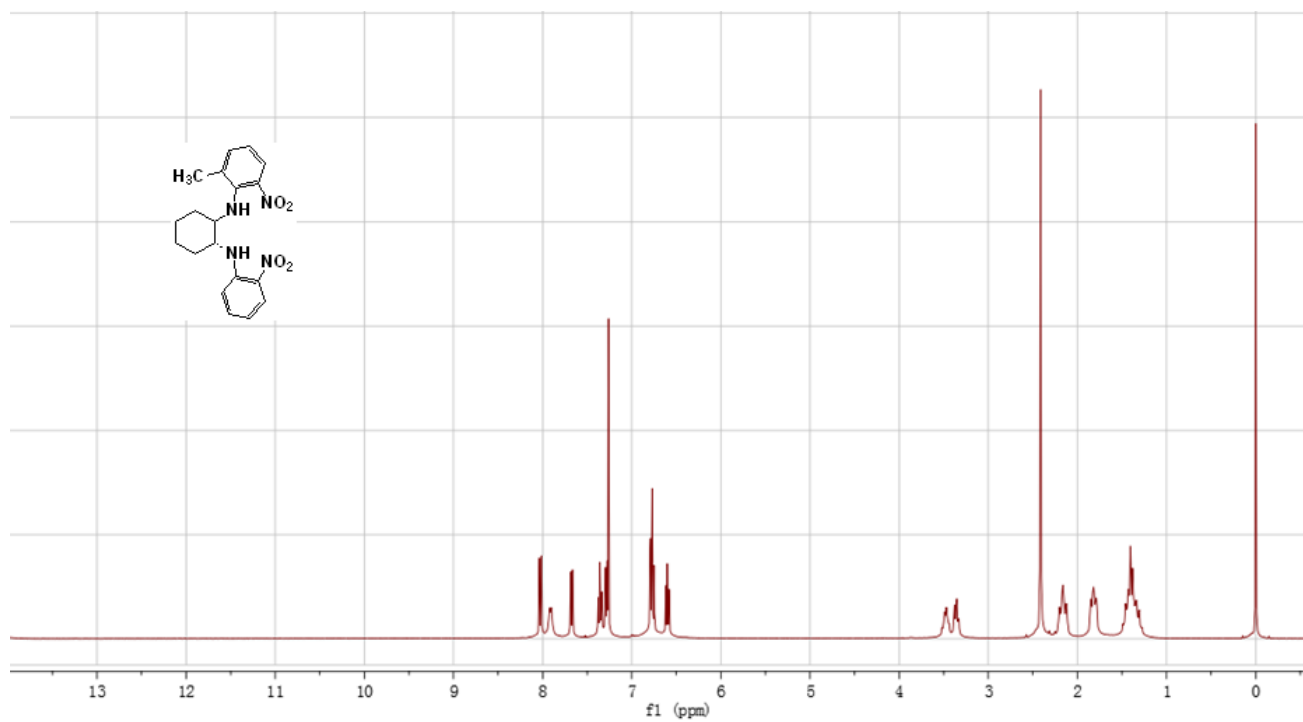

**Figure S3.** The  $^1\text{H}$  NMR spectrum of  $(R,R)$ -**2c** in  $\text{CDCl}_3$  at  $20\text{ }^\circ\text{C}$

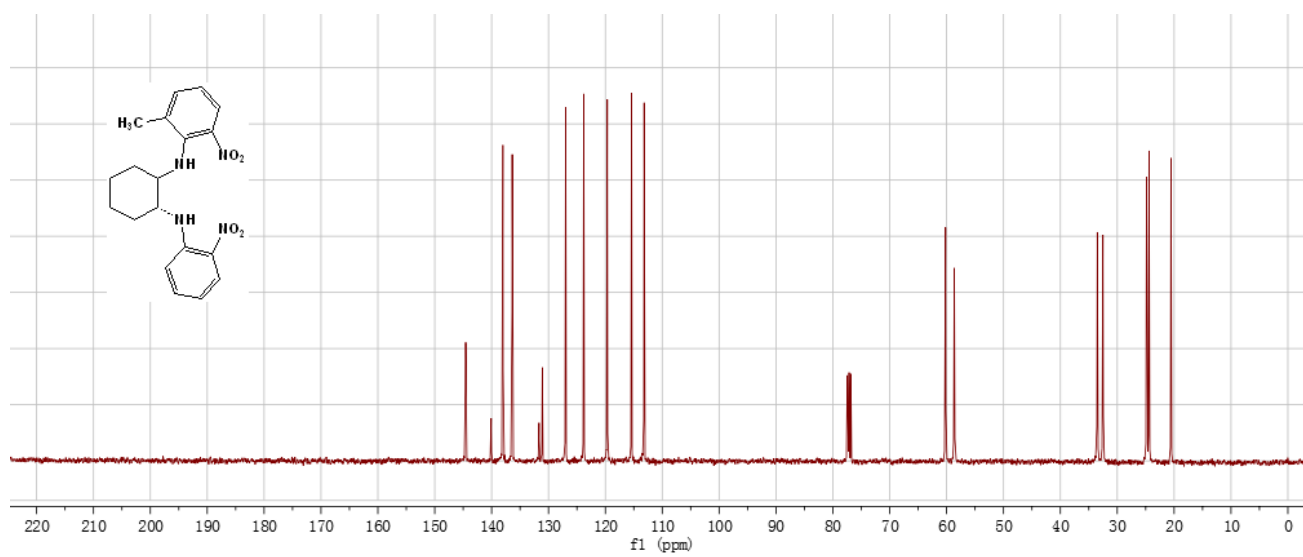

**Figure S4.** The  $^{13}\text{C}$  NMR spectrum of  $(R,R)$ -**2c** in  $\text{CDCl}_3$  at  $20\text{ }^\circ\text{C}$

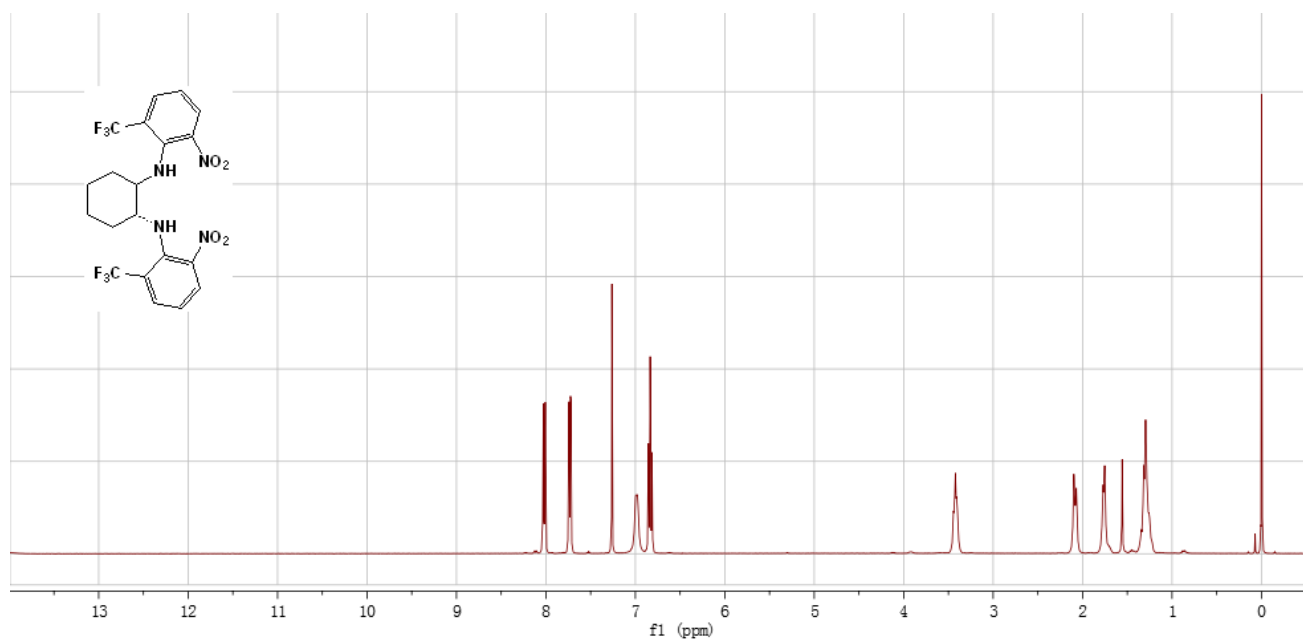

**Figure S5.** The  $^1\text{H}$  NMR spectrum of  $(R,R)$ -**2d** in  $\text{CDCl}_3$  at  $20^\circ\text{C}$

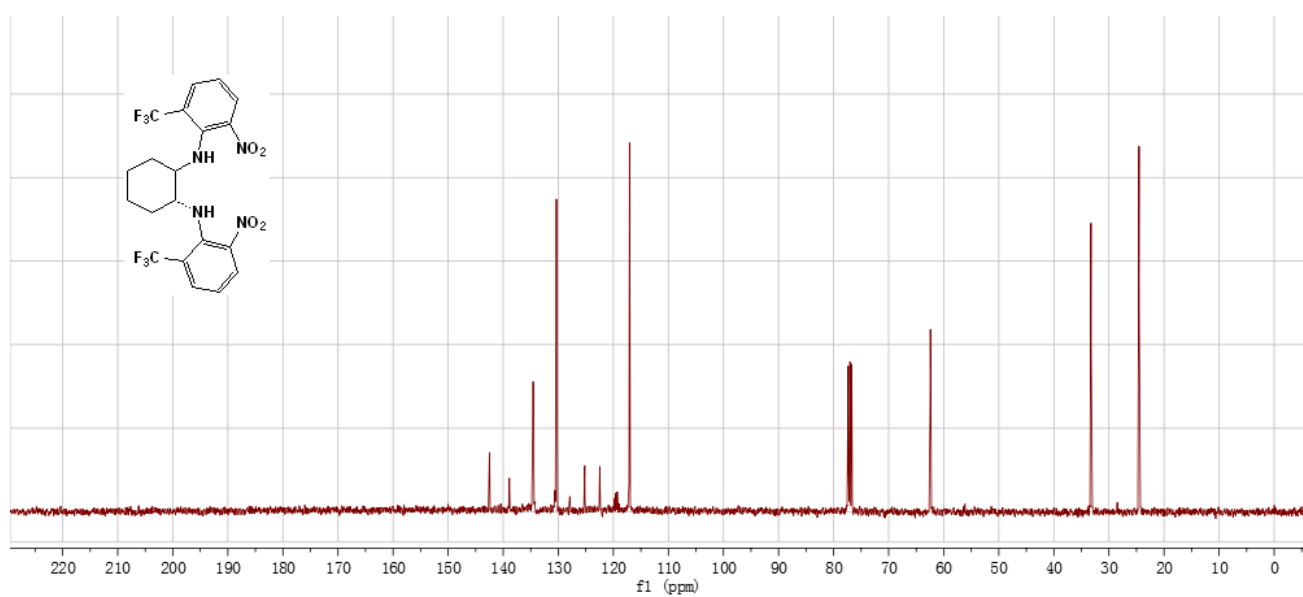

**Figure S6.** The  $^{13}\text{C}$  NMR spectrum of  $(R,R)$ -**2d** in  $\text{CDCl}_3$  at  $20^\circ\text{C}$

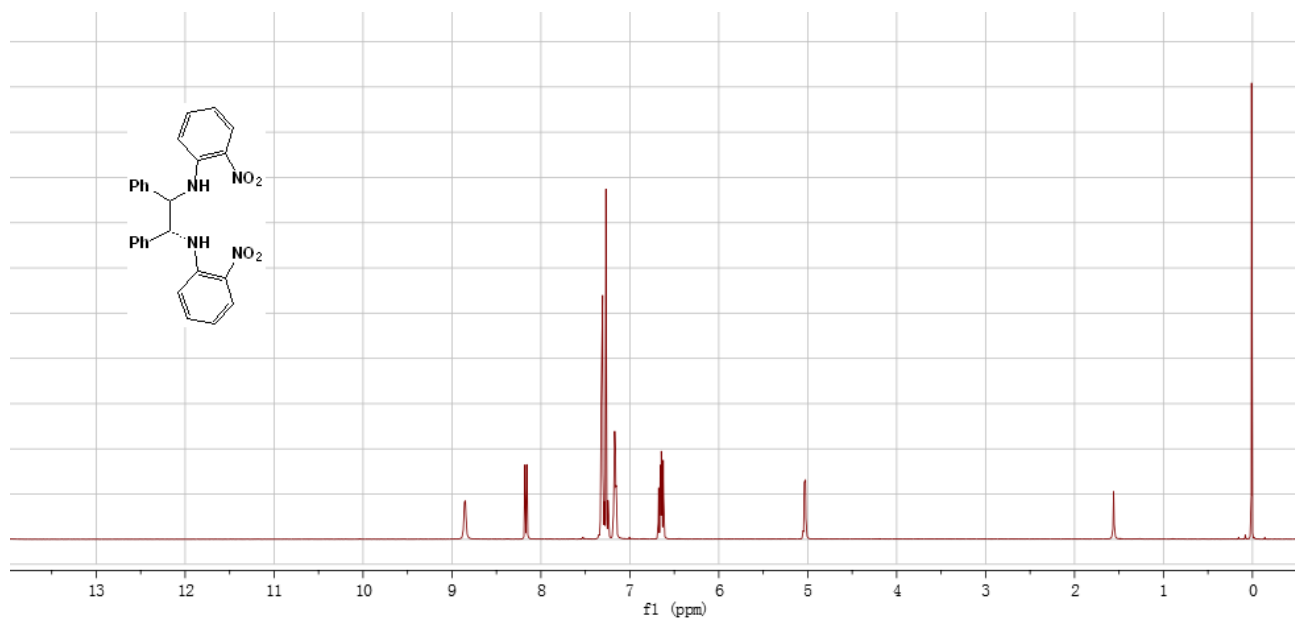

**Figure S7.** The  $^1\text{H}$  NMR spectrum of  $(R,R)$ -5a in  $\text{CDCl}_3$  at  $20\text{ }^\circ\text{C}$

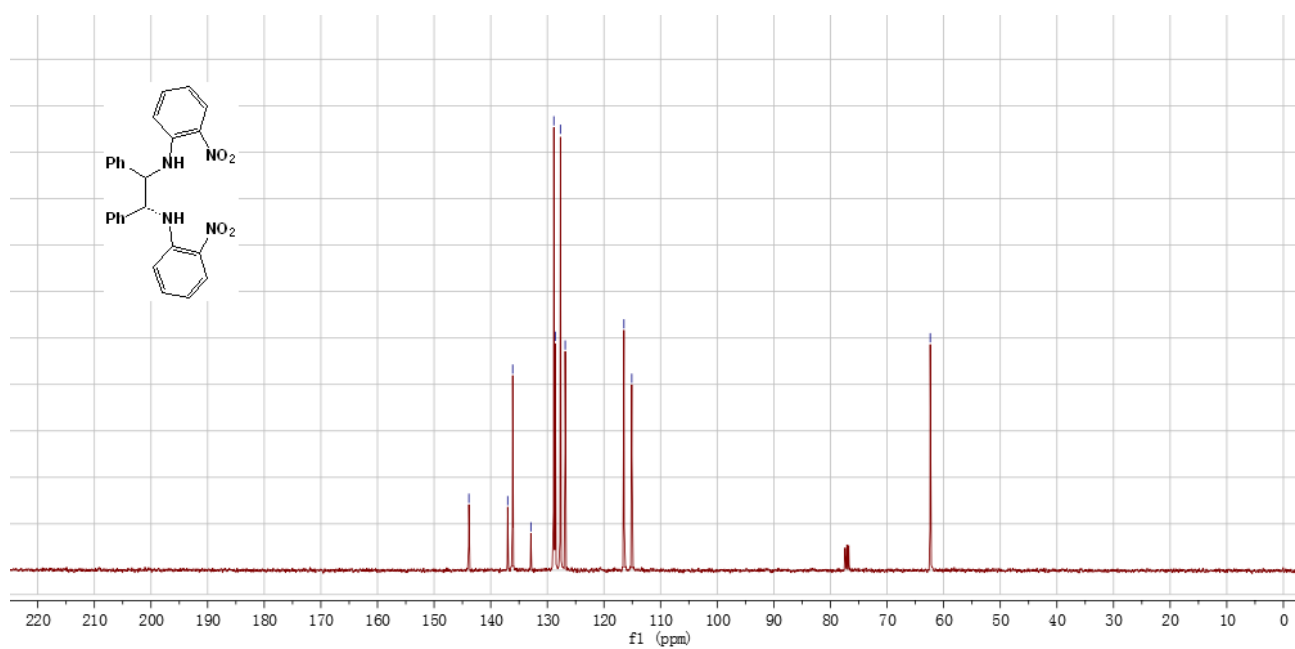

**Figure S8.** The  $^{13}\text{C}$  NMR spectrum of  $(R,R)$ -5a in  $\text{CDCl}_3$  at  $20\text{ }^\circ\text{C}$



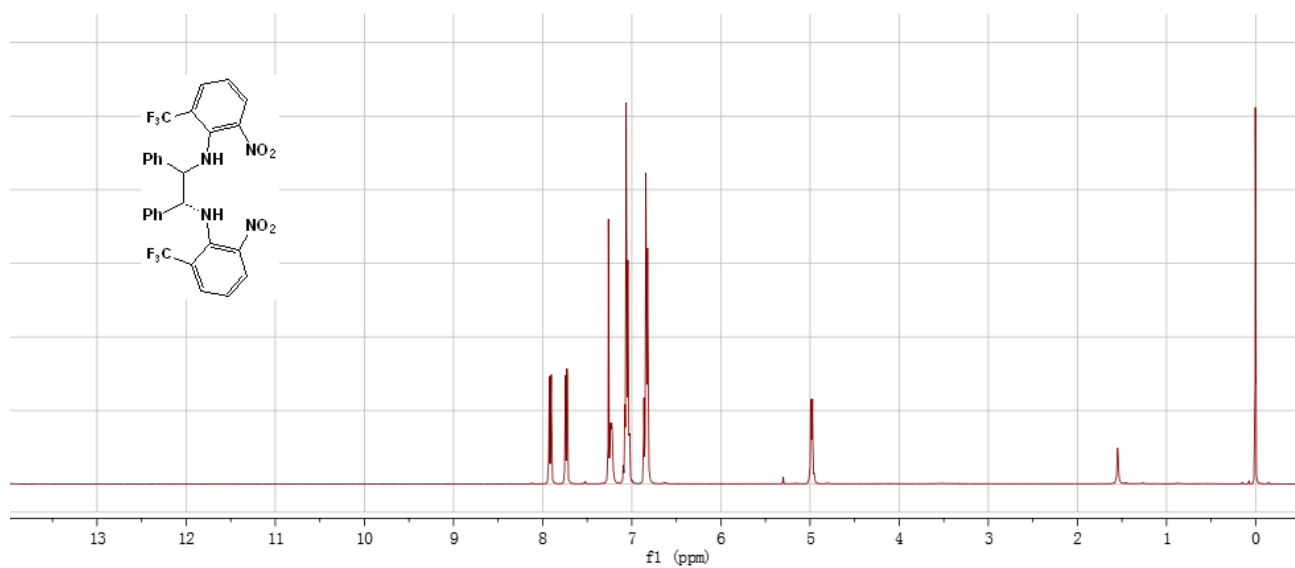

**Figure S9.** The <sup>1</sup>H NMR spectrum of (R,R)-5b in CDCl<sub>3</sub> at 20 °C

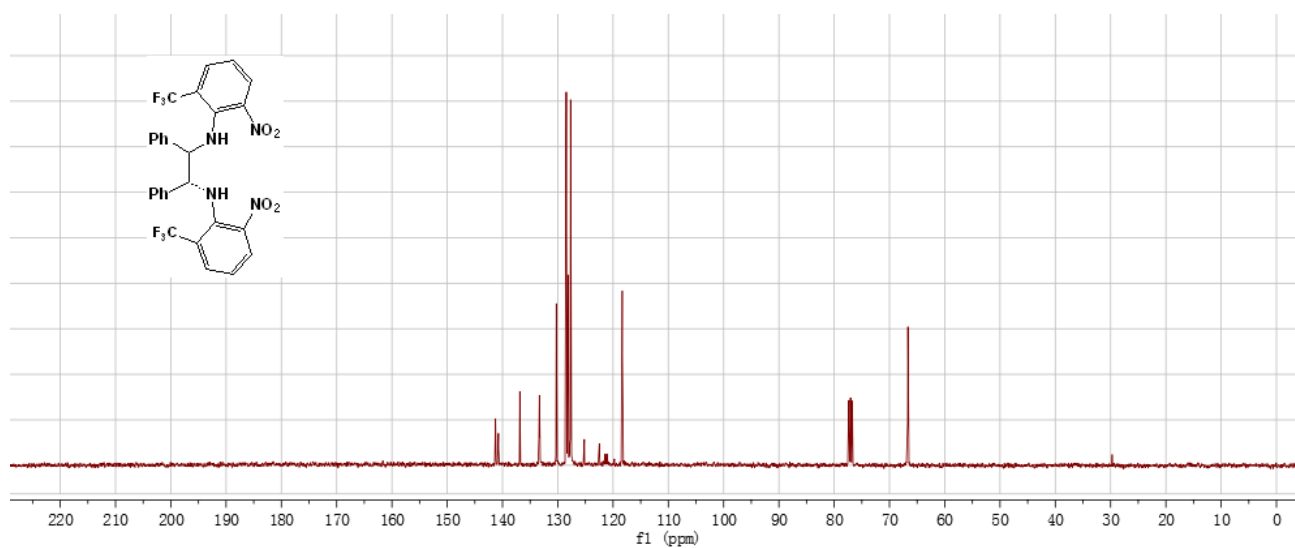

**Figure S10.** The <sup>13</sup>C NMR spectrum of (R,R)-5b in CDCl<sub>3</sub> at 20 °C

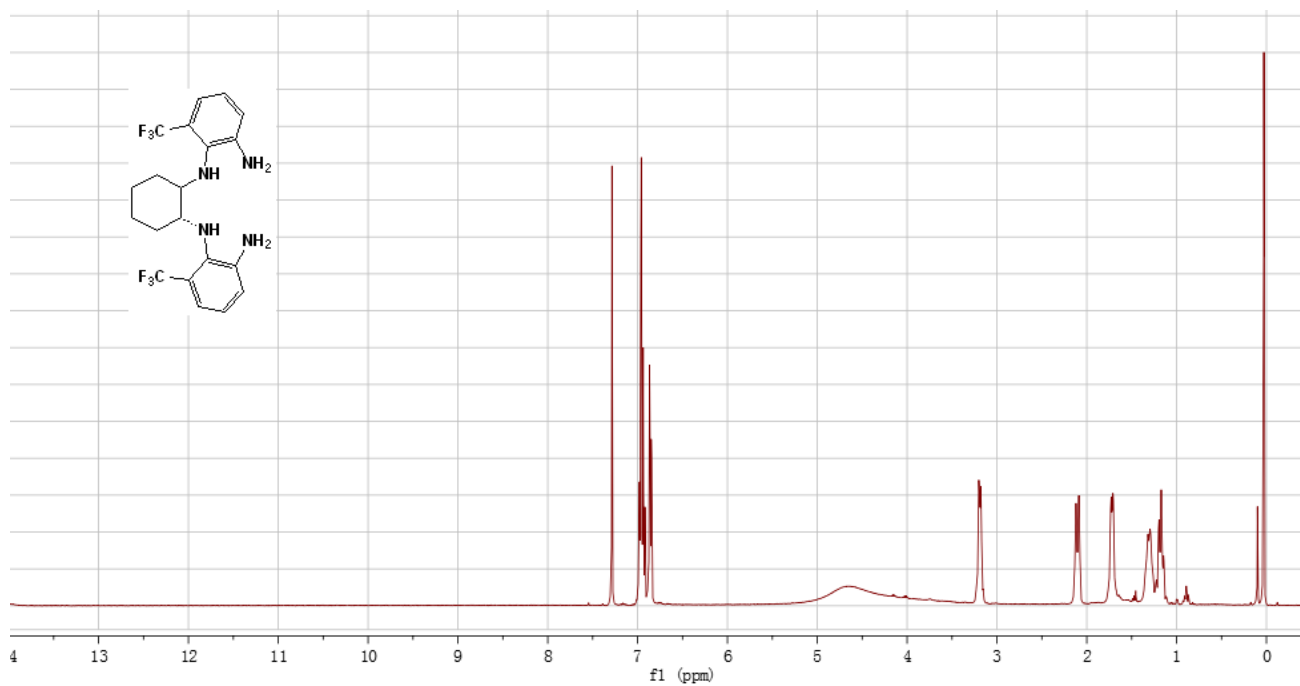

**Figure S11.** The  $^1\text{H}$  NMR spectrum of  $(R,R)$ -**3d** in  $\text{CDCl}_3$  at  $20^\circ\text{C}$

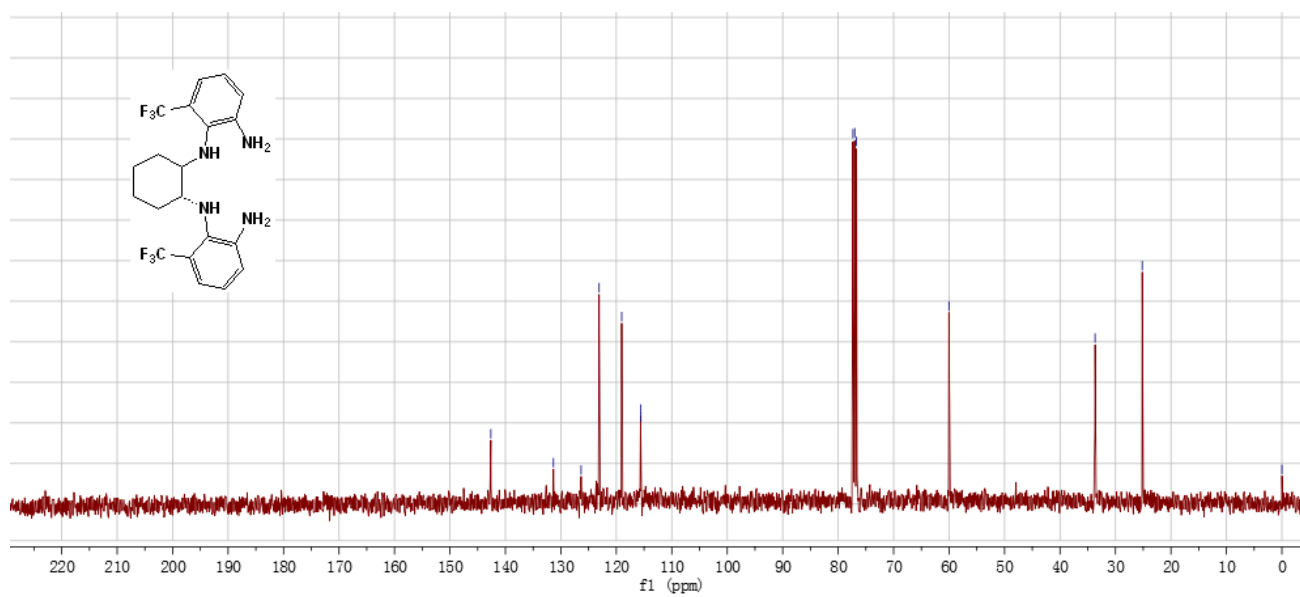

**Figure S12.** The  $^{13}\text{C}$  NMR spectrum of  $(R,R)$ -**3d** in  $\text{CDCl}_3$  at  $20^\circ\text{C}$

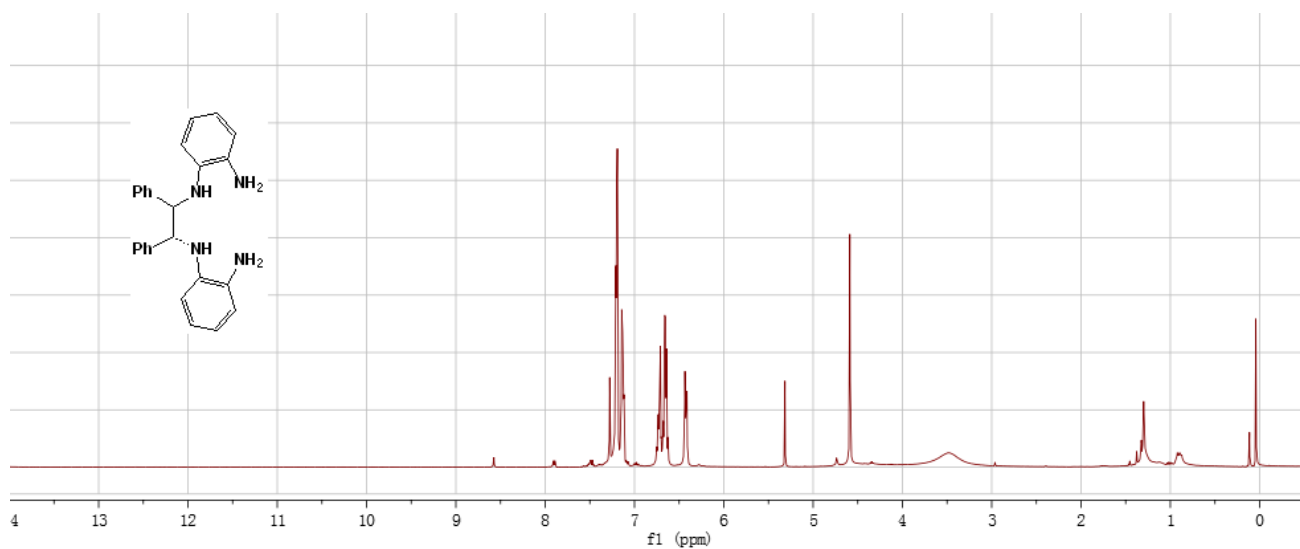

**Figure S13.** The  $^1\text{H}$  NMR spectrum of (*R,R*)-**6** in  $\text{CDCl}_3$  at  $20\text{ }^\circ\text{C}$

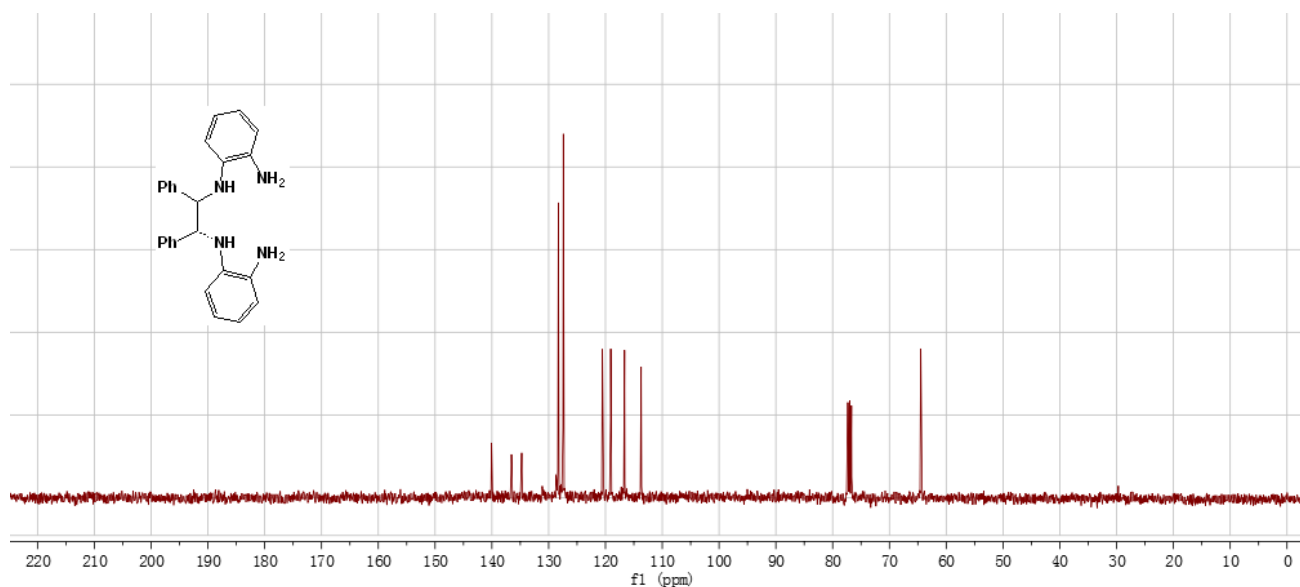

**Figure S14.** The  $^{13}\text{C}$  NMR spectrum of (*R,R*)-**6** in  $\text{CDCl}_3$  at  $20\text{ }^\circ\text{C}$

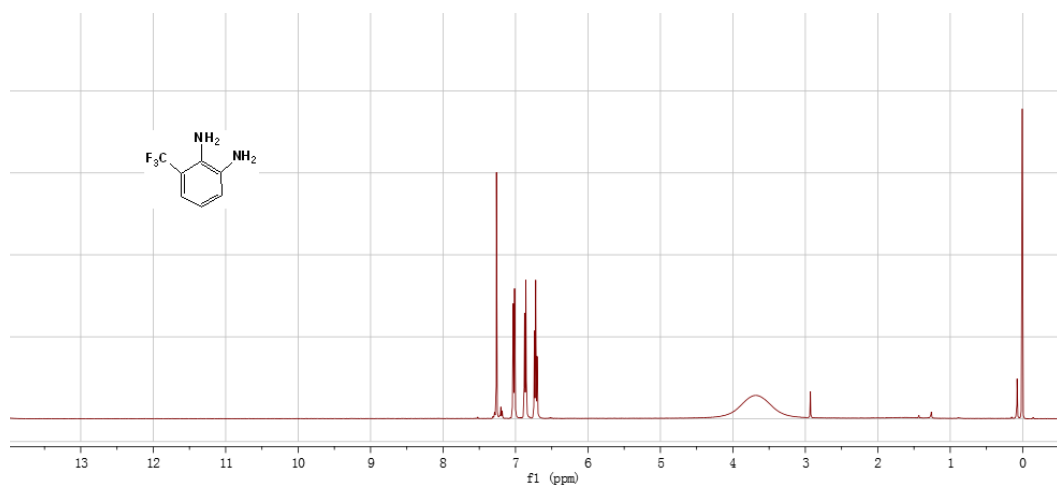

**Figure S15.** The  $^1\text{H}$  NMR spectrum of **7a** in  $\text{CDCl}_3$  at  $20^\circ\text{C}$

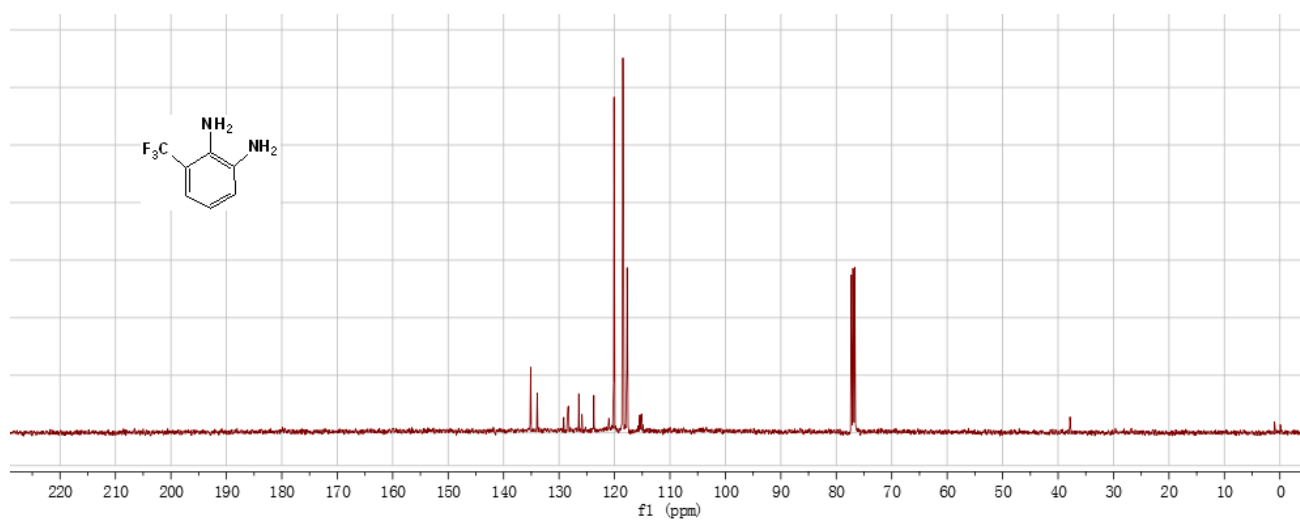

**Figure S16.** The  $^{13}\text{C}$  NMR spectrum of **7a** in  $\text{CDCl}_3$  at  $20^\circ\text{C}$



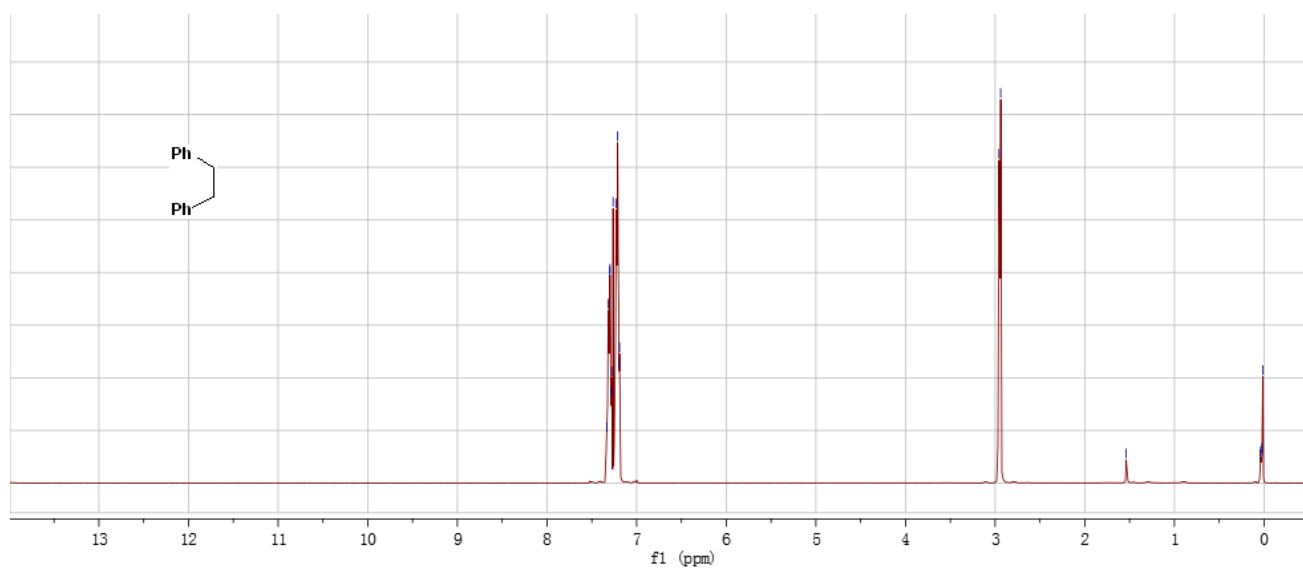

**Figure S19.** The  $^1\text{H}$  NMR spectrum of **7b** in  $\text{CDCl}_3$  at  $20\text{ }^\circ\text{C}$

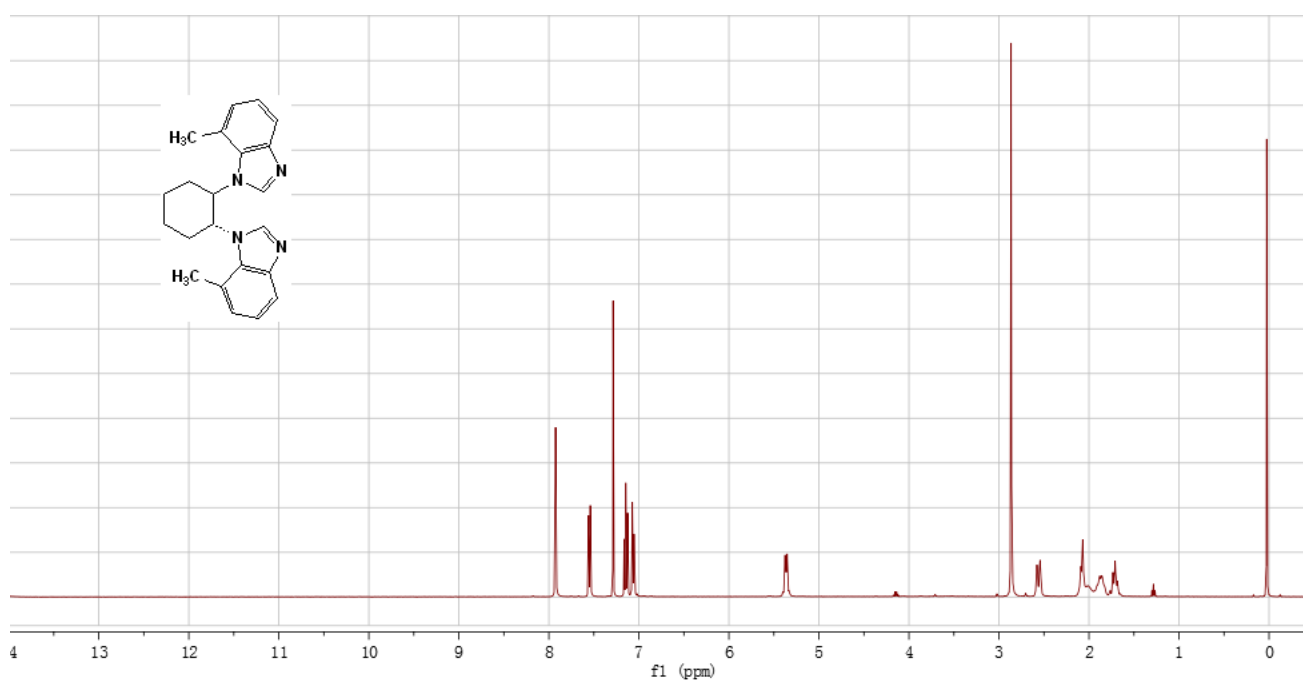

**Figure S20.** The  $^1\text{H}$  NMR spectrum of  $(R,R)$ -**1b** in  $\text{CDCl}_3$  at  $20\text{ }^\circ\text{C}$

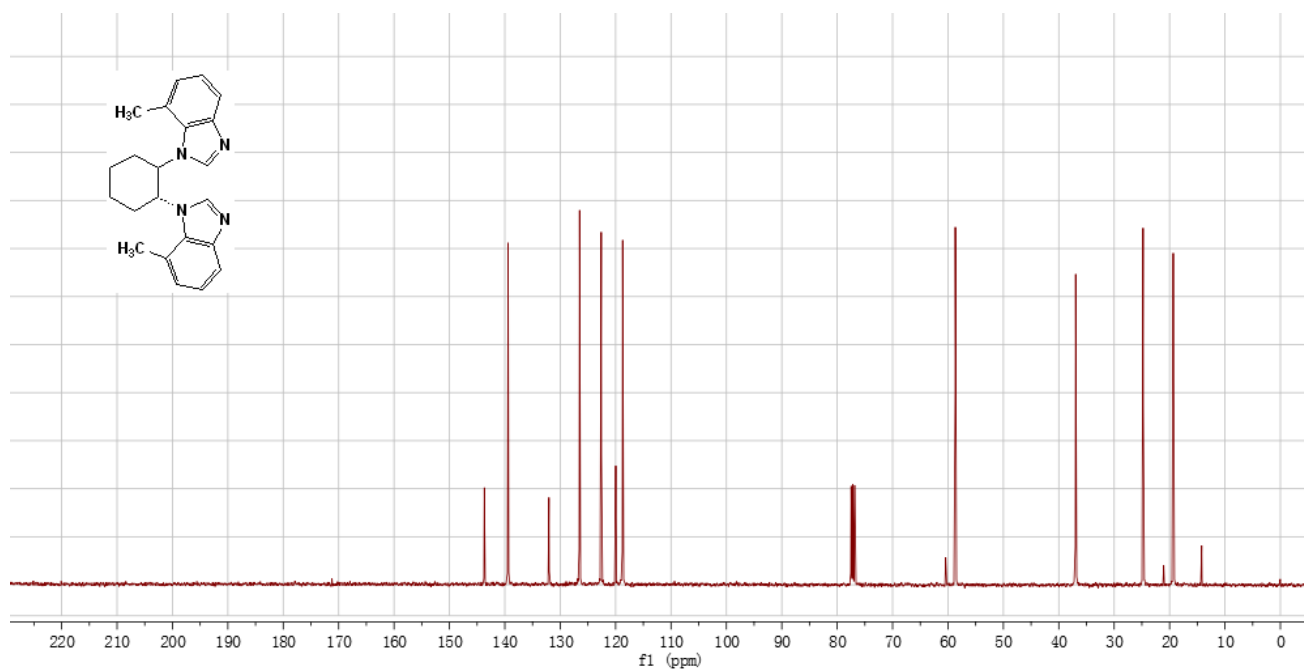

**Figure S21.** The  $^{13}\text{C}$  NMR spectrum of  $(R,R)$ -**1b** in  $\text{CDCl}_3$  at  $20\text{ }^\circ\text{C}$

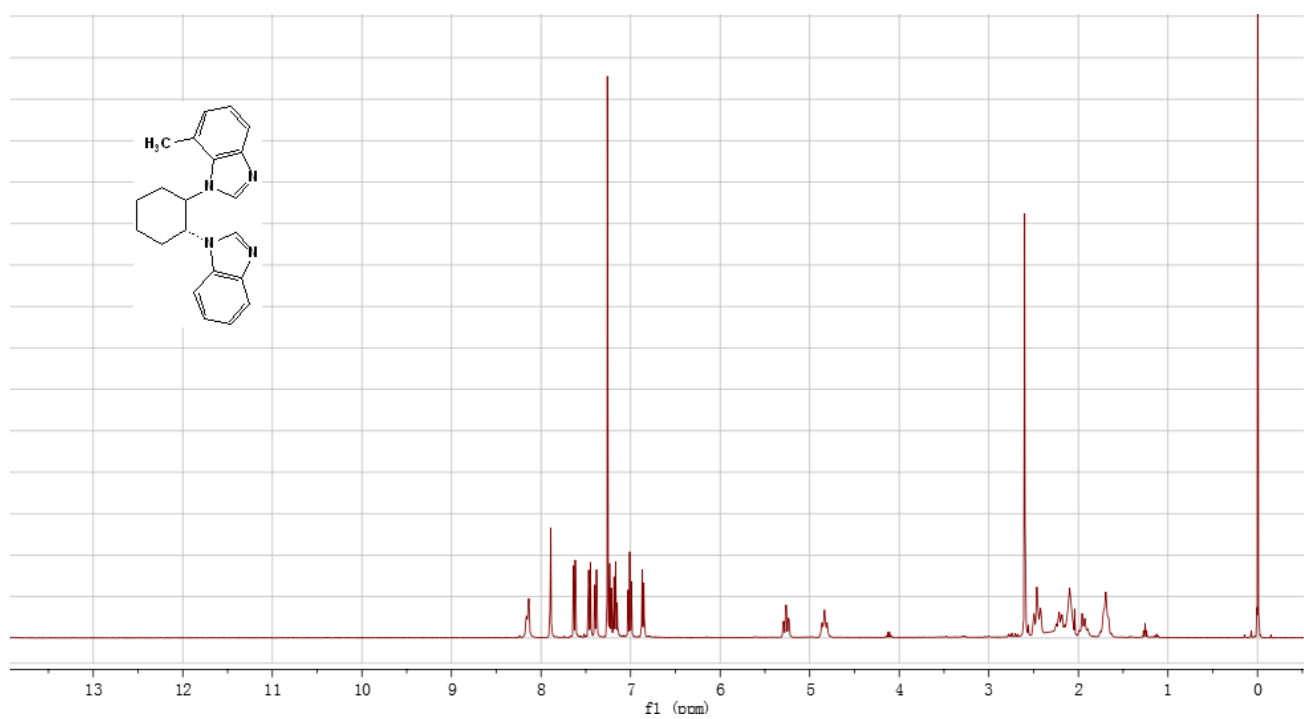

**Figure S22.** The  $^1\text{H}$  NMR spectrum of  $(R,R)$ -**1c** in  $\text{CDCl}_3$  at  $20\text{ }^\circ\text{C}$

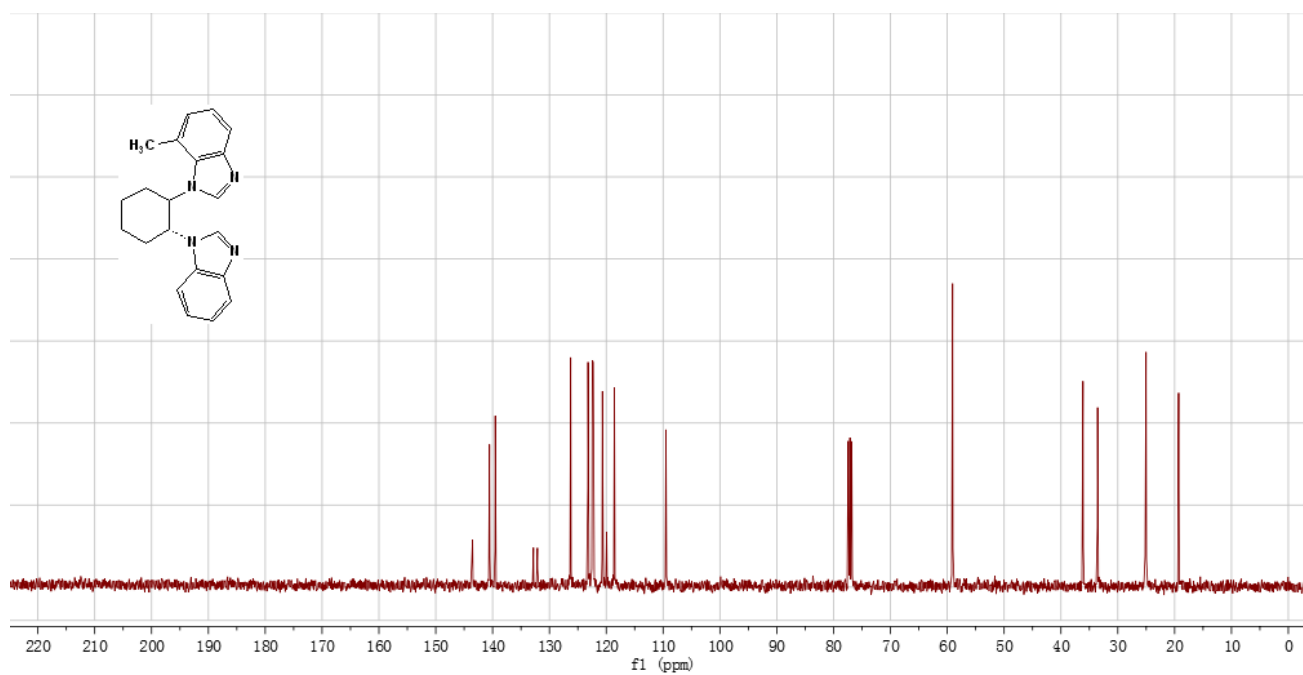

**Figure S23.** The  $^{13}\text{C}$  NMR spectrum of  $(R,R)$ -**1c** in  $\text{CDCl}_3$  at  $20\text{ }^\circ\text{C}$

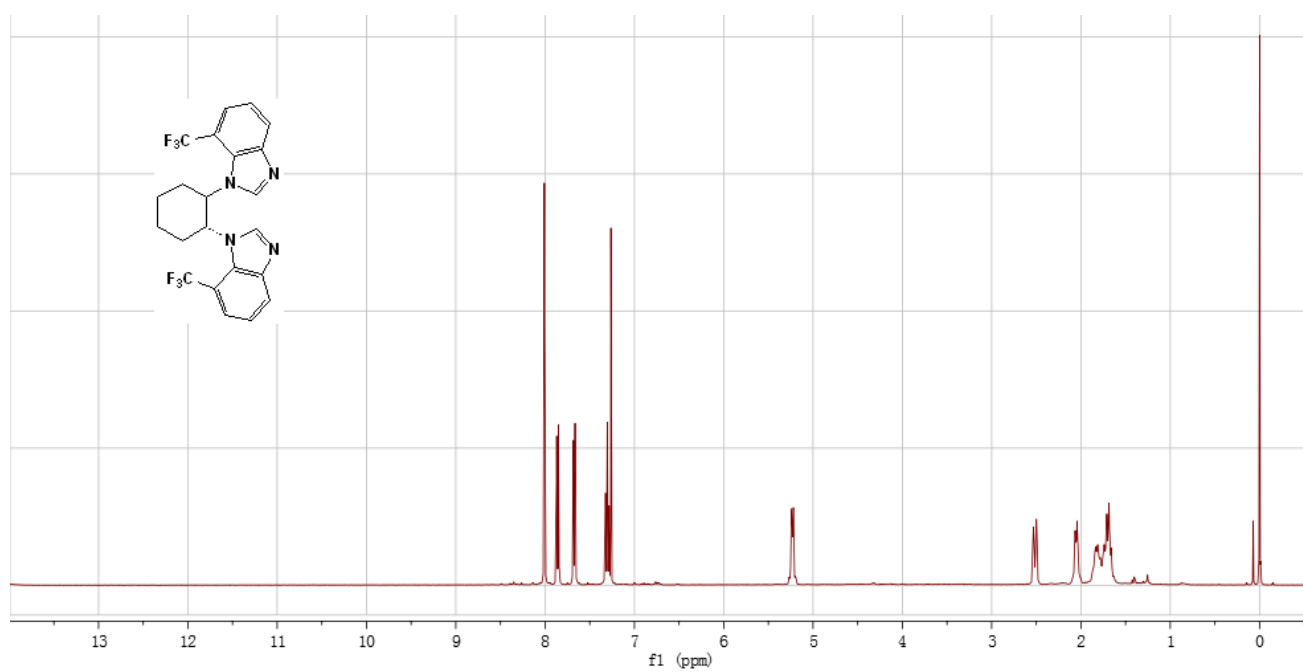

**Figure S24.** The  $^1\text{H}$  NMR spectrum of  $(R,R)$ -**1d** in  $\text{CDCl}_3$  at  $20\text{ }^\circ\text{C}$



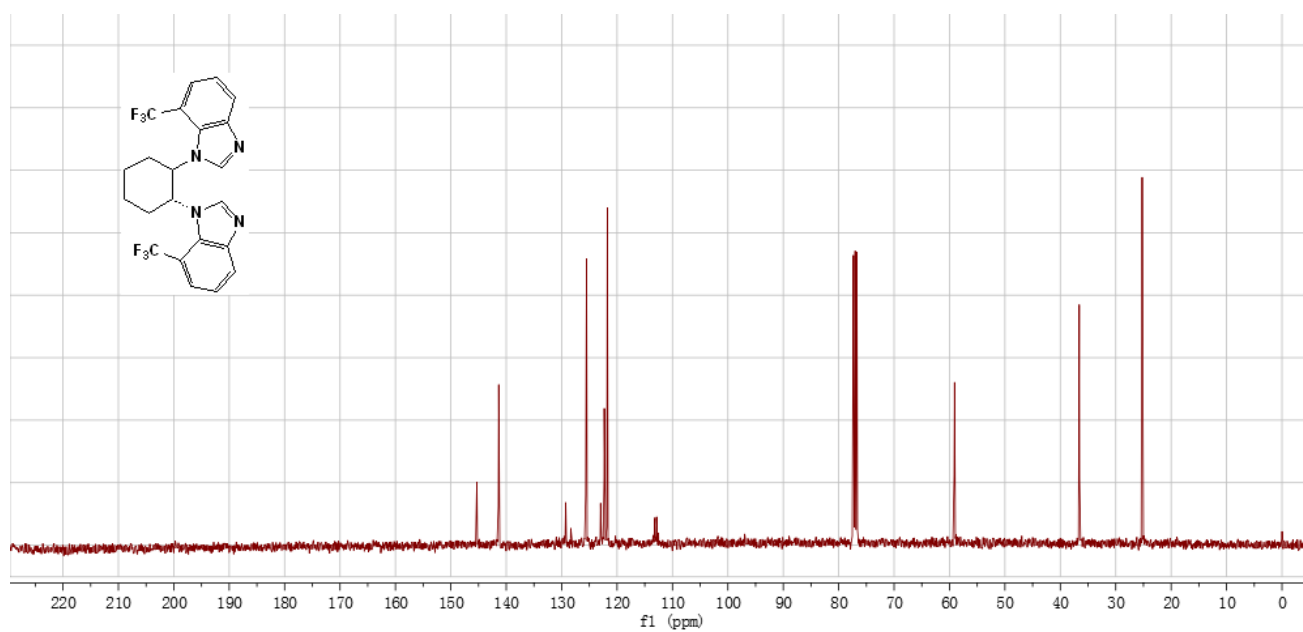

Figure S25. The  $^{13}\text{C}$  NMR spectrum of  $(R,R)$ -**1d** in  $\text{CDCl}_3$  at  $20^\circ\text{C}$

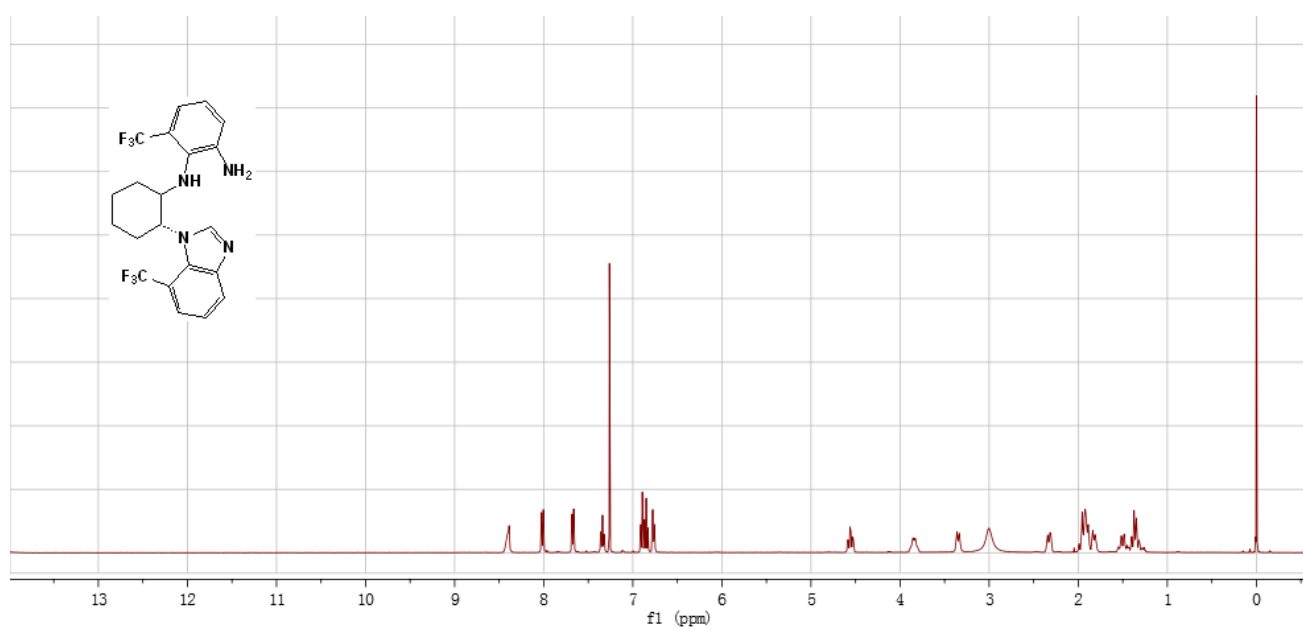

Figure S26. The  $^1\text{H}$  NMR spectrum of  $(R,R)$ -**1d'** in  $\text{CDCl}_3$  at  $20^\circ\text{C}$

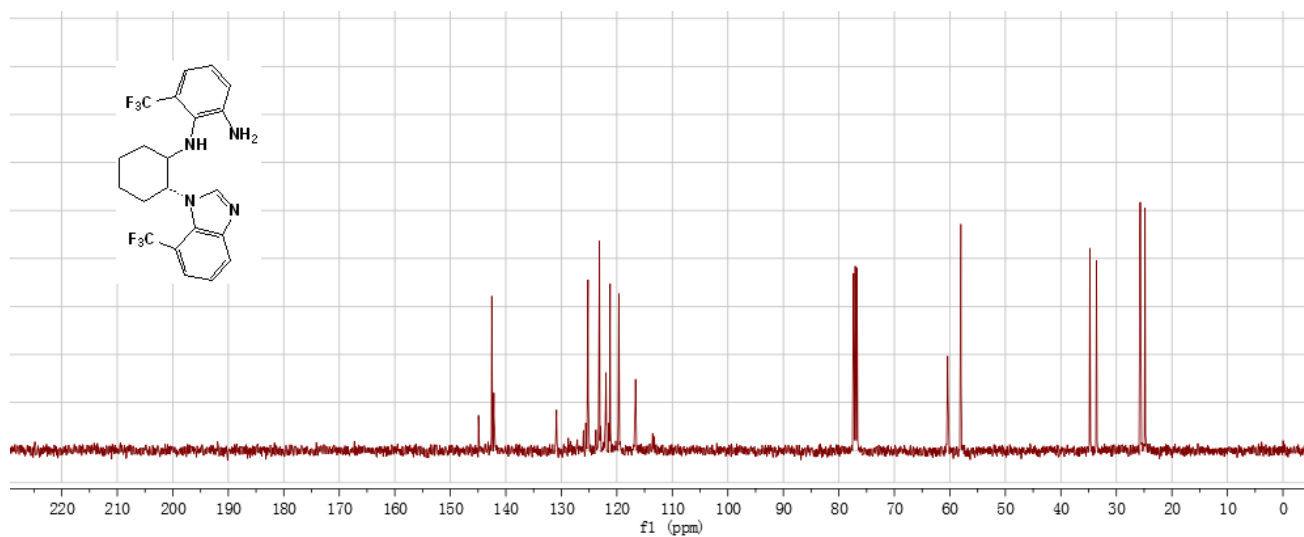

**Figure S27.** The  $^{13}\text{C}$  NMR spectrum of  $(R,R)$ -**1d'** in  $\text{CDCl}_3$  at  $20\text{ }^\circ\text{C}$

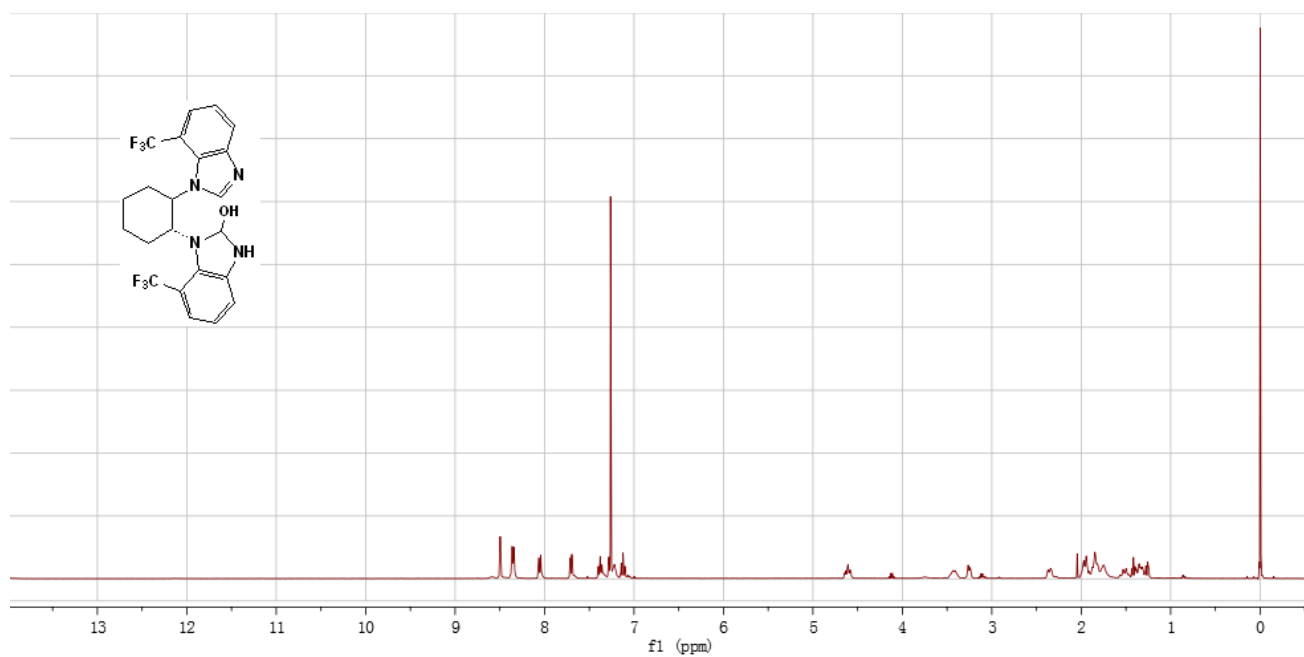

**Figure S28.** The  $^1\text{H}$  NMR spectrum of  $(R,R)$ -**1d''** in  $\text{CDCl}_3$  at  $20\text{ }^\circ\text{C}$

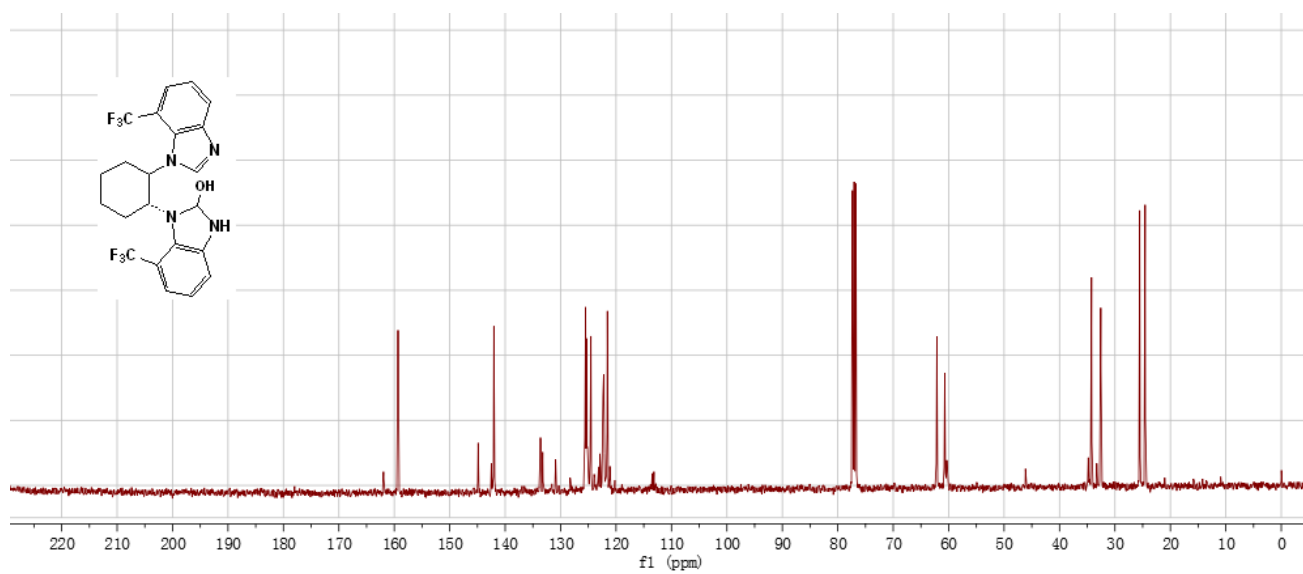

**Figure S29.** The  $^{13}\text{C}$  NMR spectrum of  $(R,R)$ -**1d''** in  $\text{CDCl}_3$  at  $20\text{ }^\circ\text{C}$

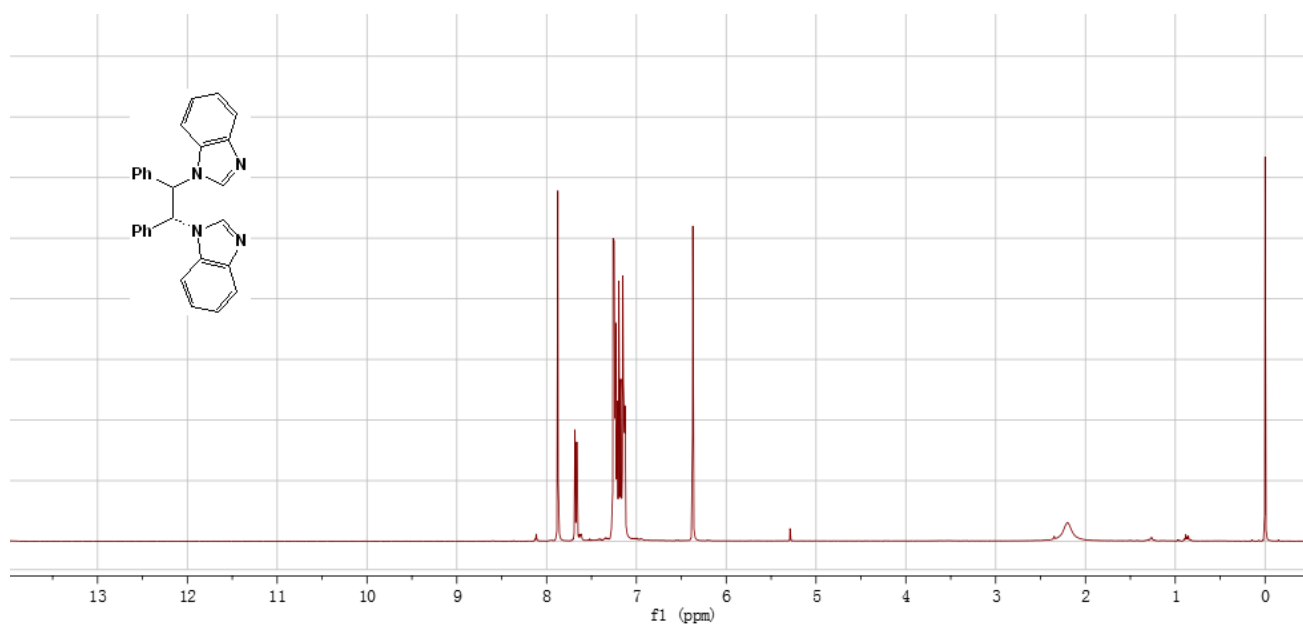

**Figure S30.** The  $^1\text{H}$  NMR spectrum of  $(R,R)$ -**4** in  $\text{CDCl}_3$  at  $20\text{ }^\circ\text{C}$

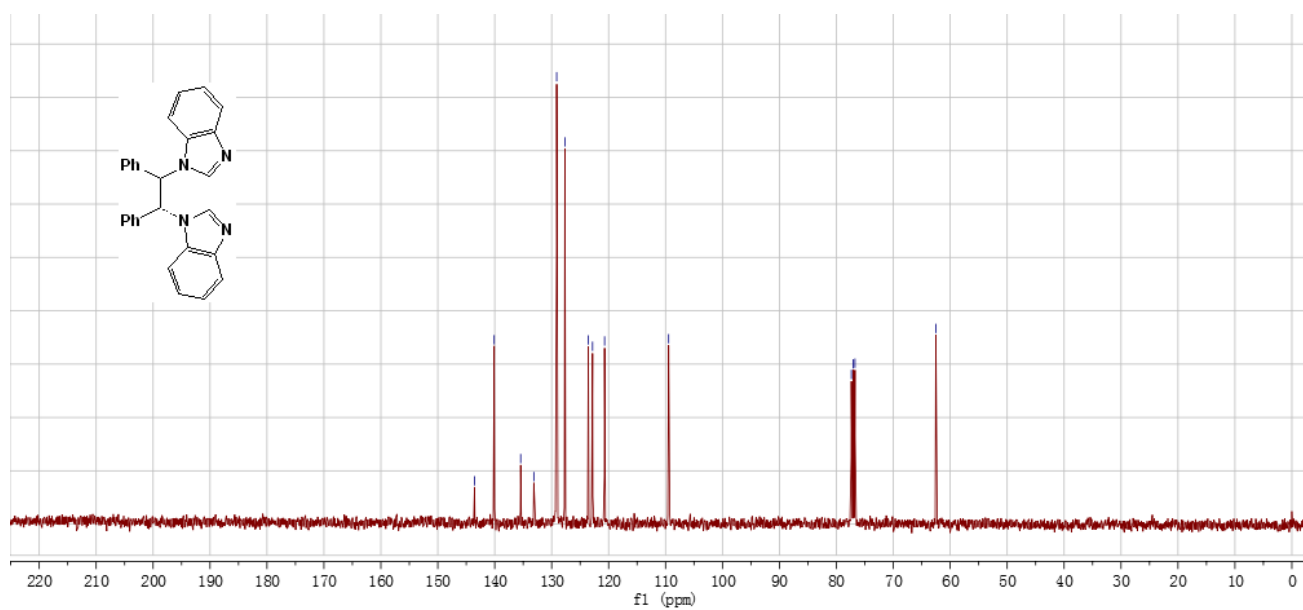

**Figure S31.** The  $^{13}\text{C}$  NMR spectrum of  $(R,R)$ -**4** in  $\text{CDCl}_3$  at  $20\text{ }^\circ\text{C}$

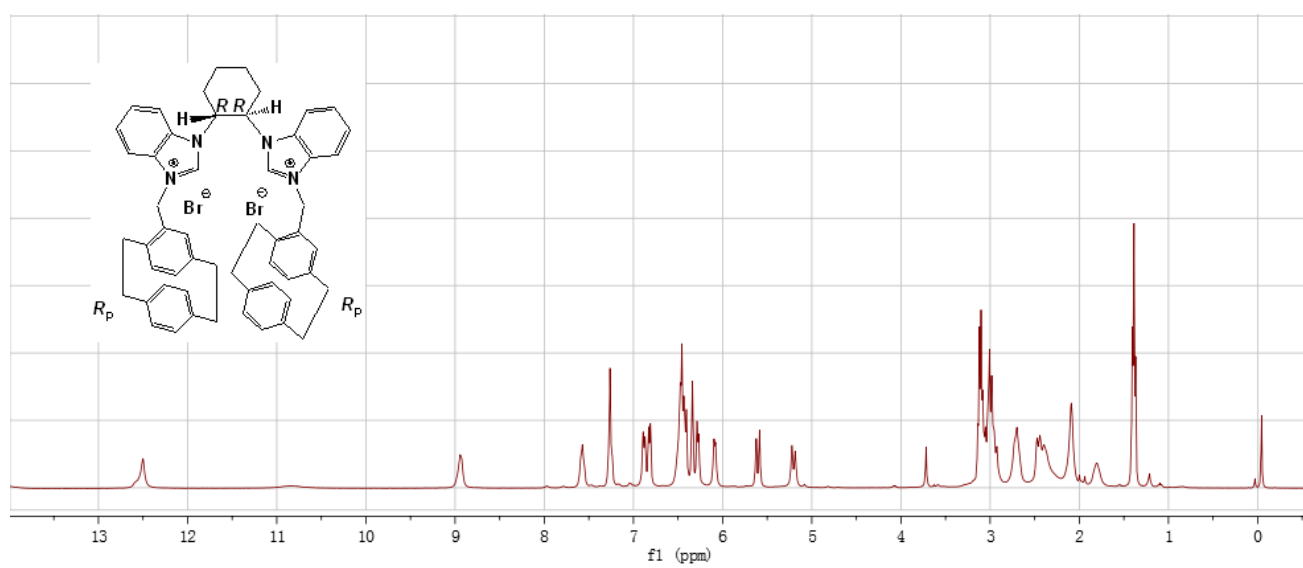

**Figure S32.** The  $^1\text{H}$  NMR spectrum of  $(R,R,R_p,R_p)$ -**11** in  $\text{CDCl}_3$  at  $20\text{ }^\circ\text{C}$

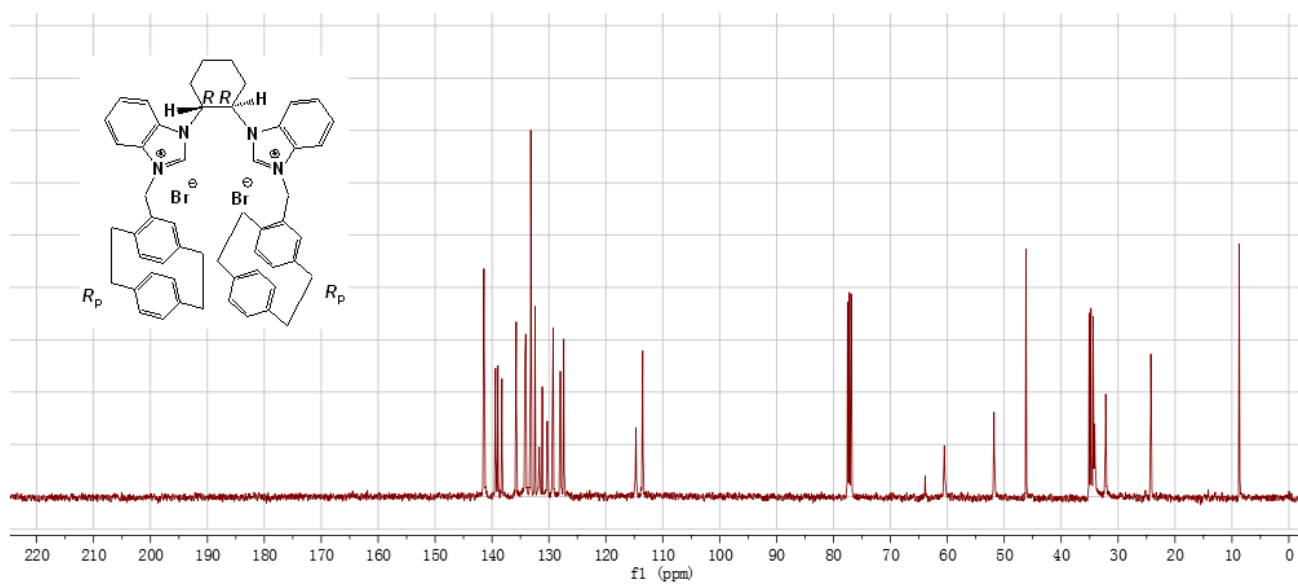

**Figure S33.** The  $^{13}\text{C}$  NMR spectrum of  $(R,R,R_p,R_p)$ -**11** in  $\text{CDCl}_3$  at  $20^\circ\text{C}$

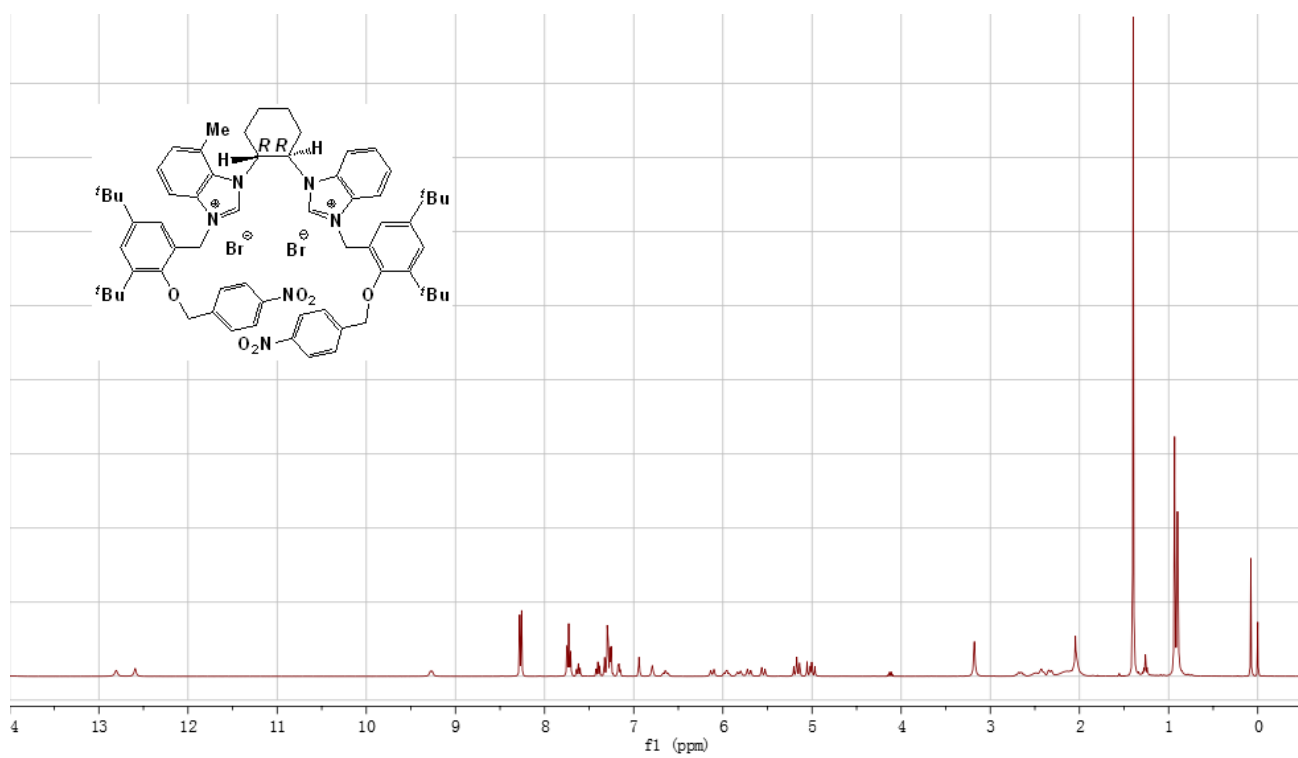

**Figure S34.** The  $^1\text{H}$  NMR spectrum of  $(R,R)$ -**12** in  $\text{CDCl}_3$  at  $20^\circ\text{C}$

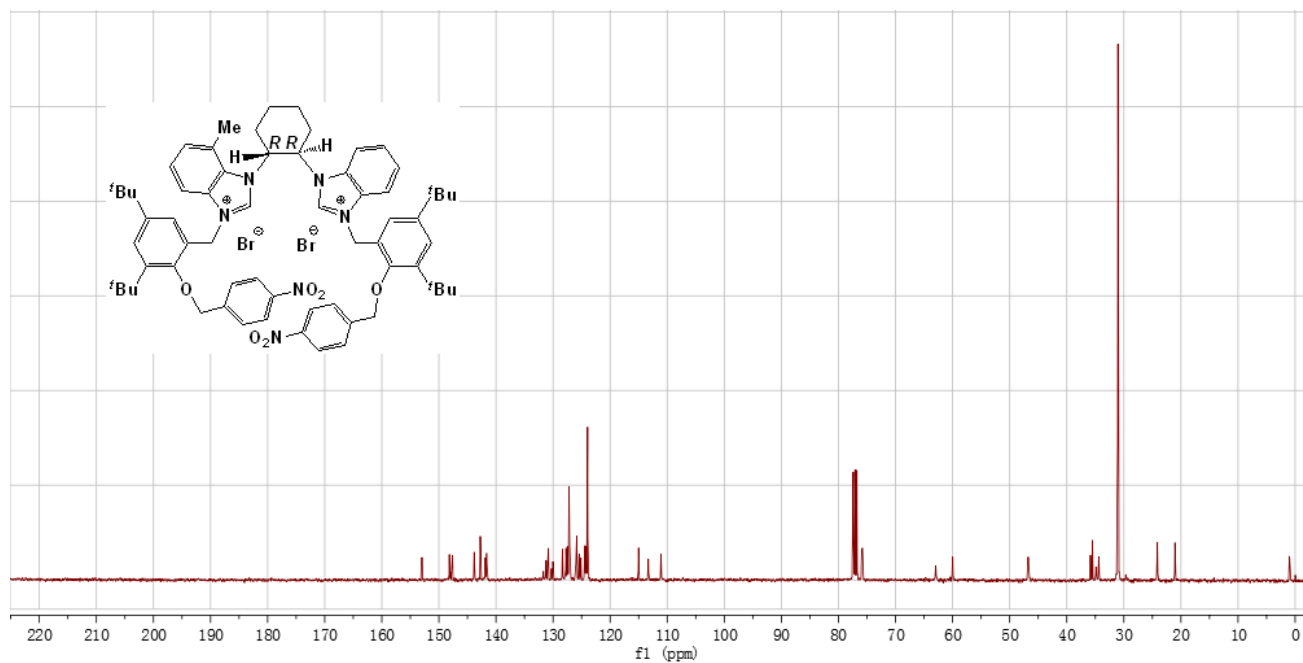

Figure S35. The  $^{13}\text{C}$  NMR spectrum of (*R,R*)-**12** in  $\text{CDCl}_3$  at 20 °C

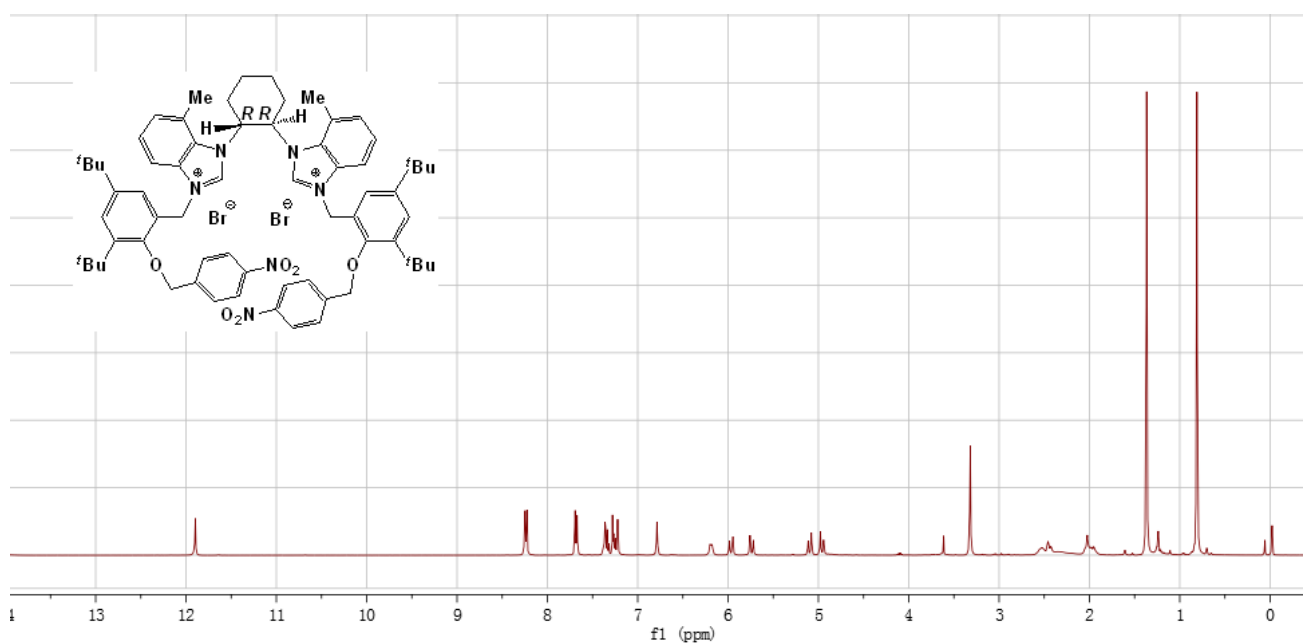

Figure S36. The  $^1\text{H}$  NMR spectrum of (*R,R*)-**13** in  $\text{CDCl}_3$  at 20 °C

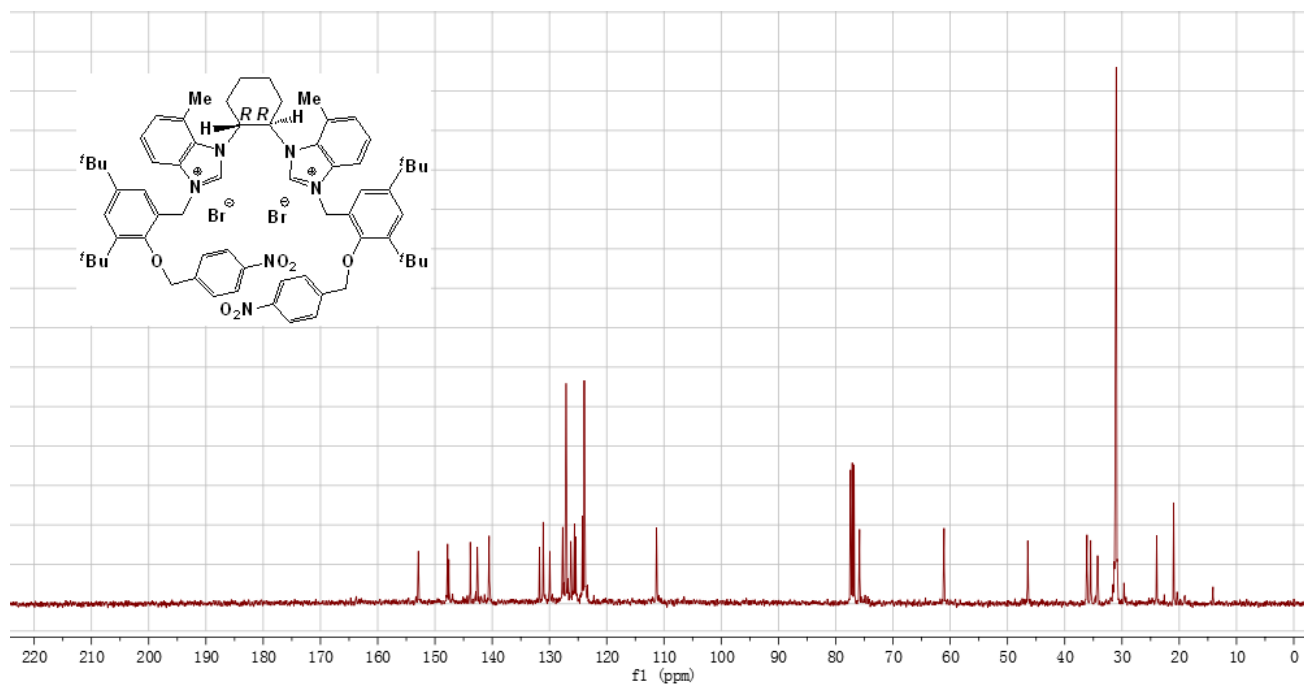

**Figure S37.** The  $^{13}\text{C}$  NMR spectrum of  $(R,R)$ -13 in  $\text{CDCl}_3$  at  $20^\circ\text{C}$

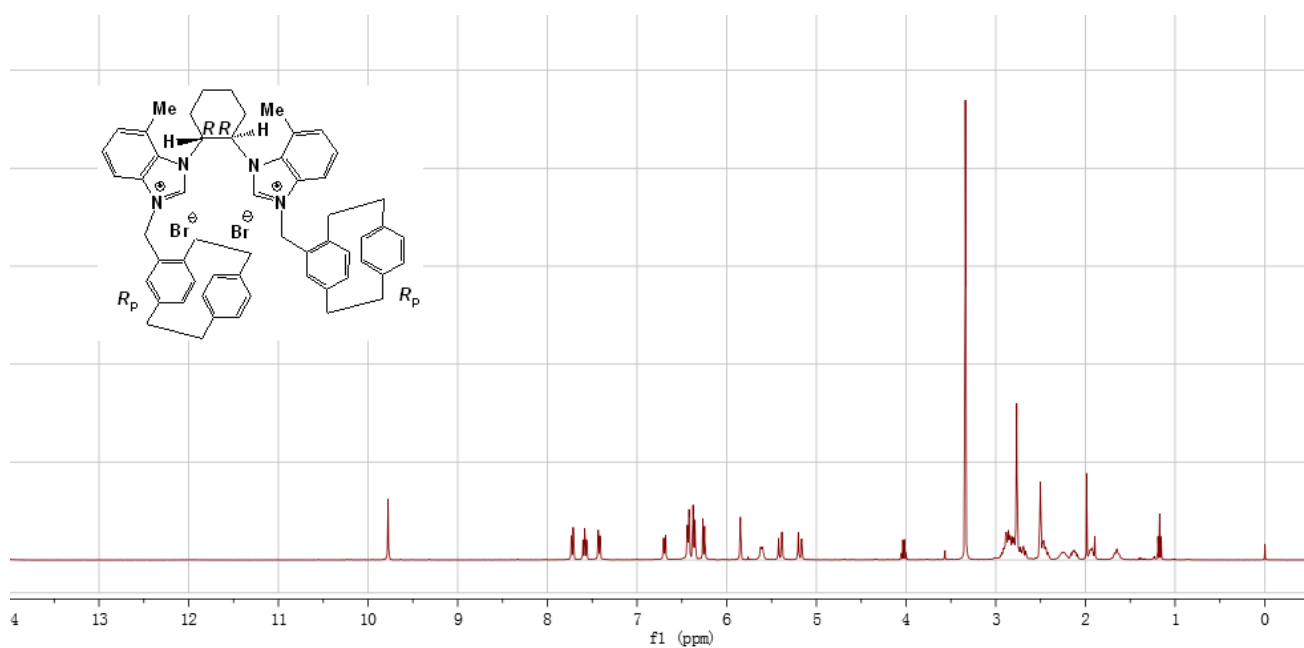

**Figure S38.** The  $^1\text{H}$  NMR spectrum of  $(R,R,R_p,R_p)$ -14 in  $(\text{CD}_3)_2\text{SO}$  at  $20^\circ\text{C}$

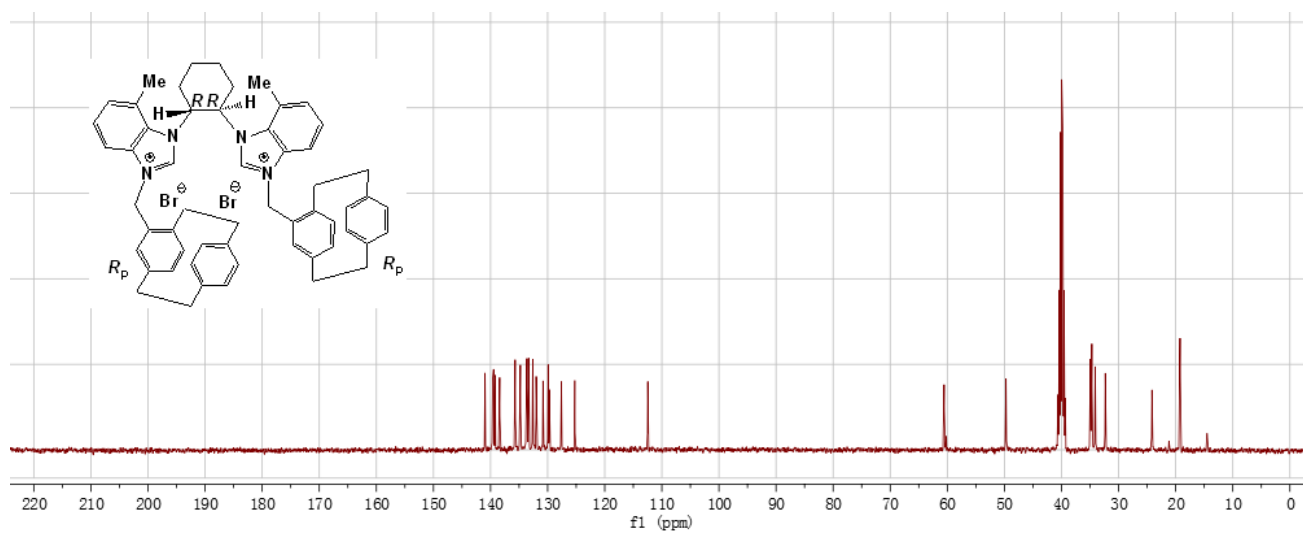

**Figure S39.** The  $^{13}\text{C}$  NMR spectrum of  $(R,R,R_p,R_p)$ -**14** in  $(\text{CD}_3)_2\text{SO}$  at  $20\text{ }^\circ\text{C}$

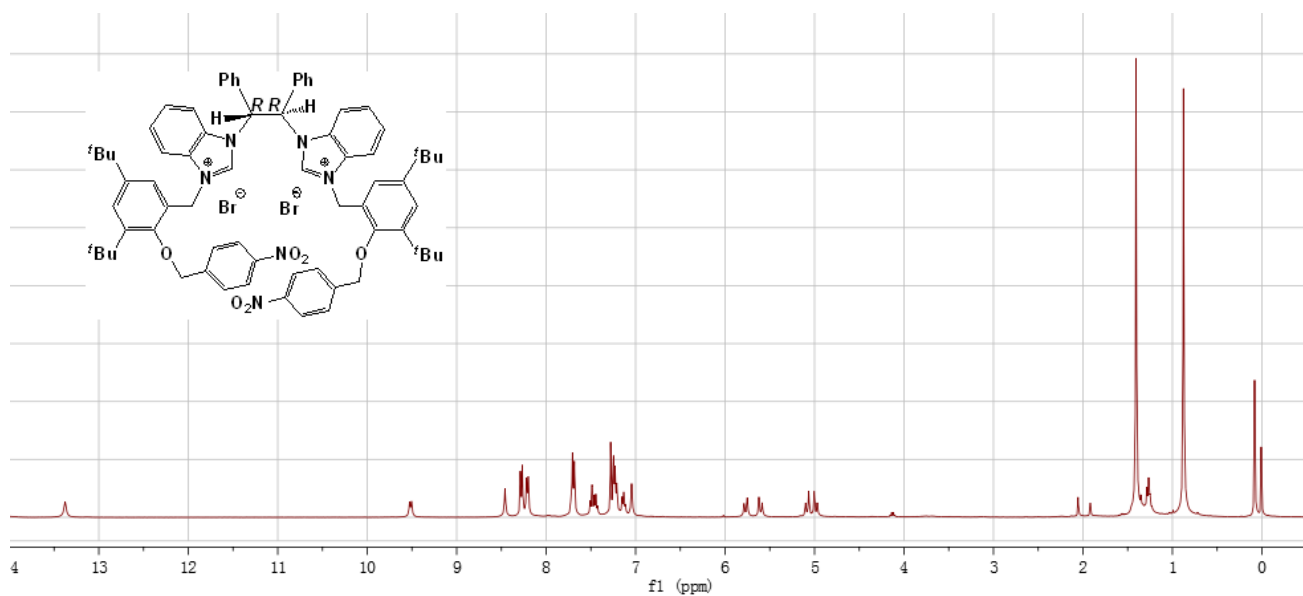

**Figure S40.** The  $^1\text{H}$  NMR spectrum of  $(R,R)$ -**15** in  $\text{CDCl}_3$  at  $20\text{ }^\circ\text{C}$



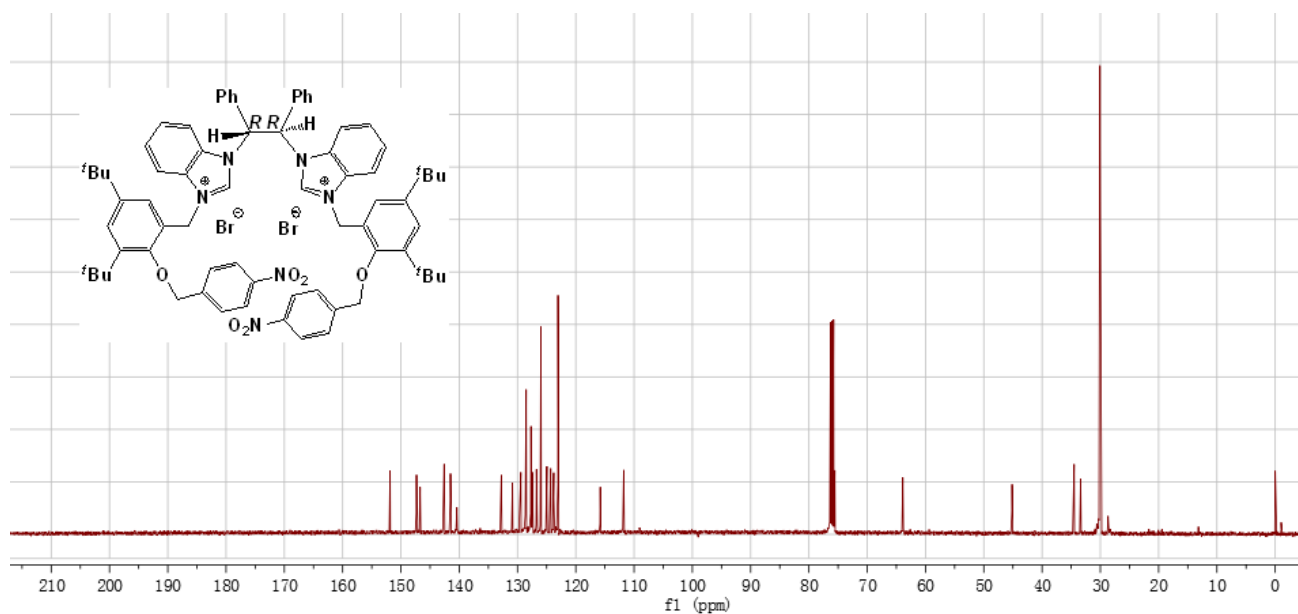

Figure S41. The  $^{13}\text{C}$  NMR spectrum of (*R,R*)-**15** in  $\text{CDCl}_3$  at  $20\text{ }^\circ\text{C}$

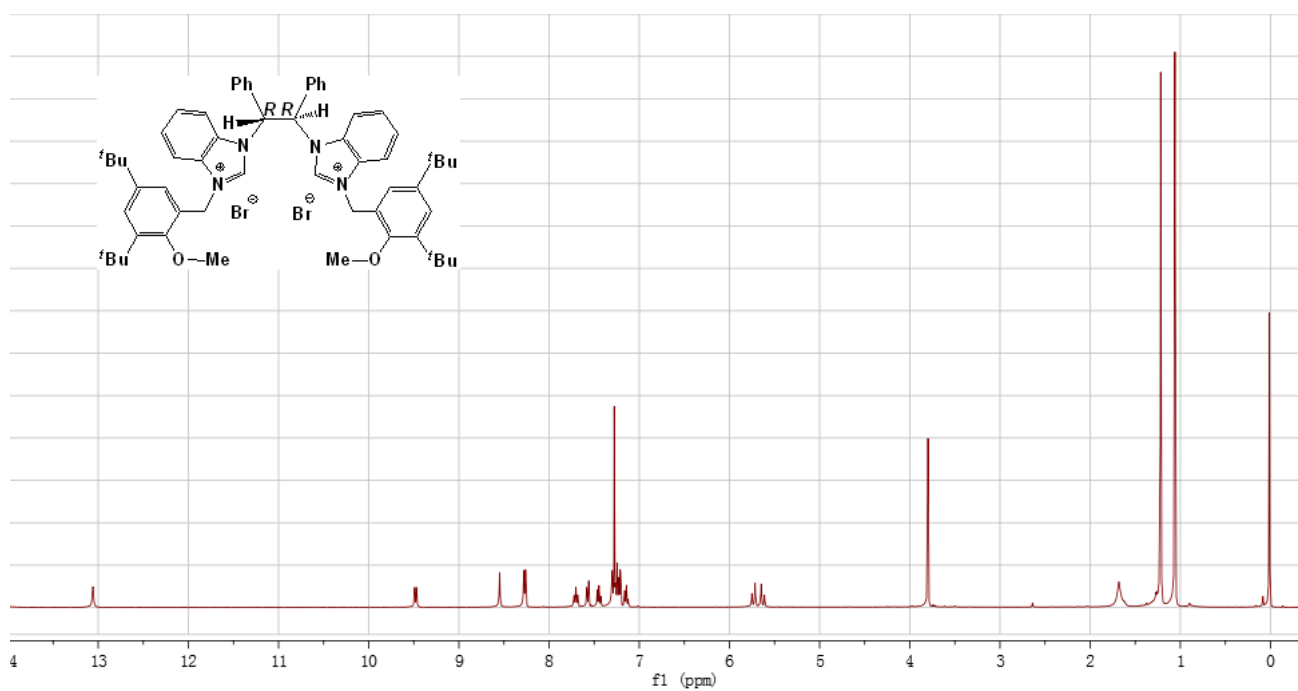

Figure S42. The  $^1\text{H}$  NMR spectrum of (*R,R*)-**16** in  $\text{CDCl}_3$  at  $20\text{ }^\circ\text{C}$

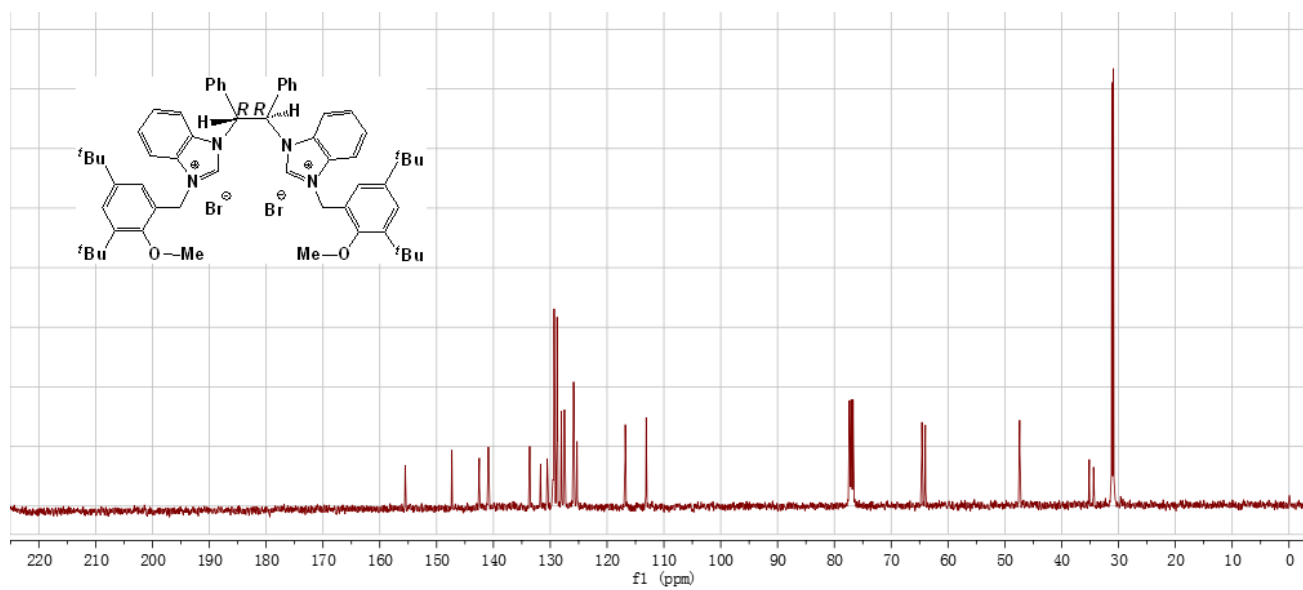

**Figure S43.** The  $^{13}\text{C}$  NMR spectrum of  $(R,R)$ -**16** in  $\text{CDCl}_3$  at  $20^\circ\text{C}$

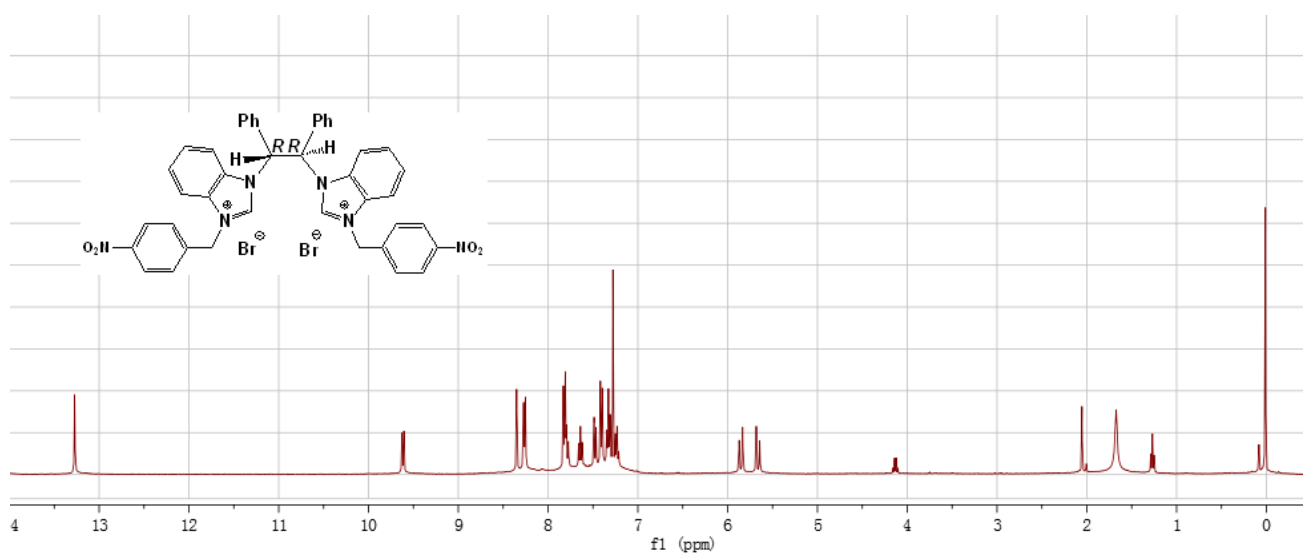

**Figure S44.** The  $^1\text{H}$  NMR spectrum of  $(R,R)$ -**17** in  $\text{CDCl}_3$  at  $20^\circ\text{C}$

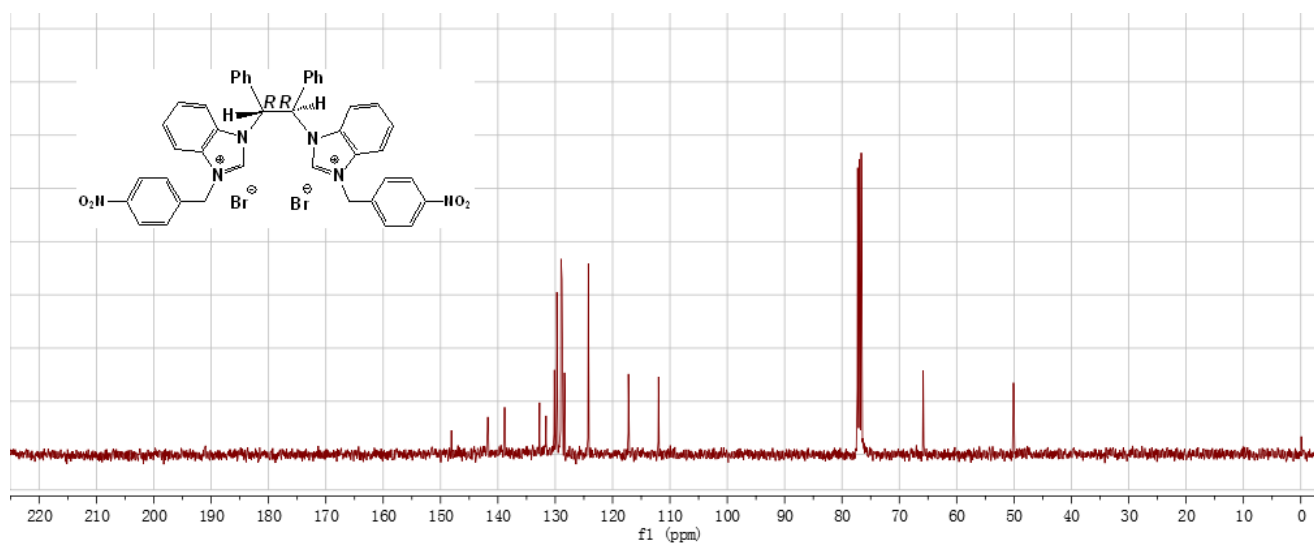

**Figure S45.** The <sup>13</sup>C NMR spectrum of *(R,R)*-17 in CDCl<sub>3</sub> at 20 °C

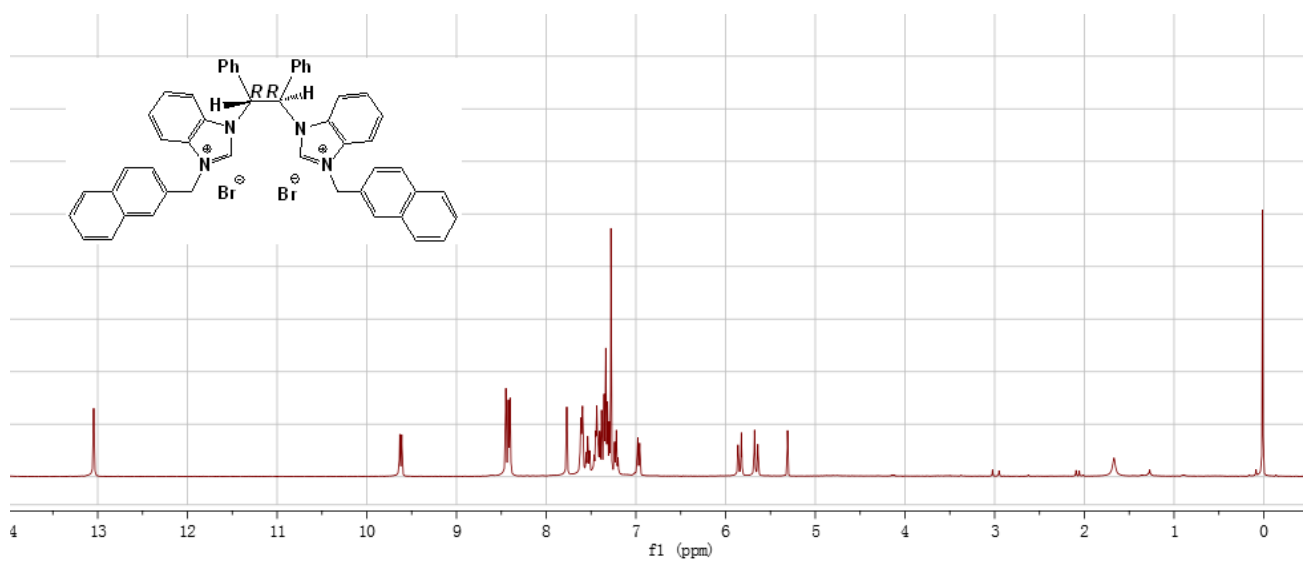

**Figure S46.** The <sup>1</sup>H NMR spectrum of *(R,R)*-18 in CDCl<sub>3</sub> at 20 °C

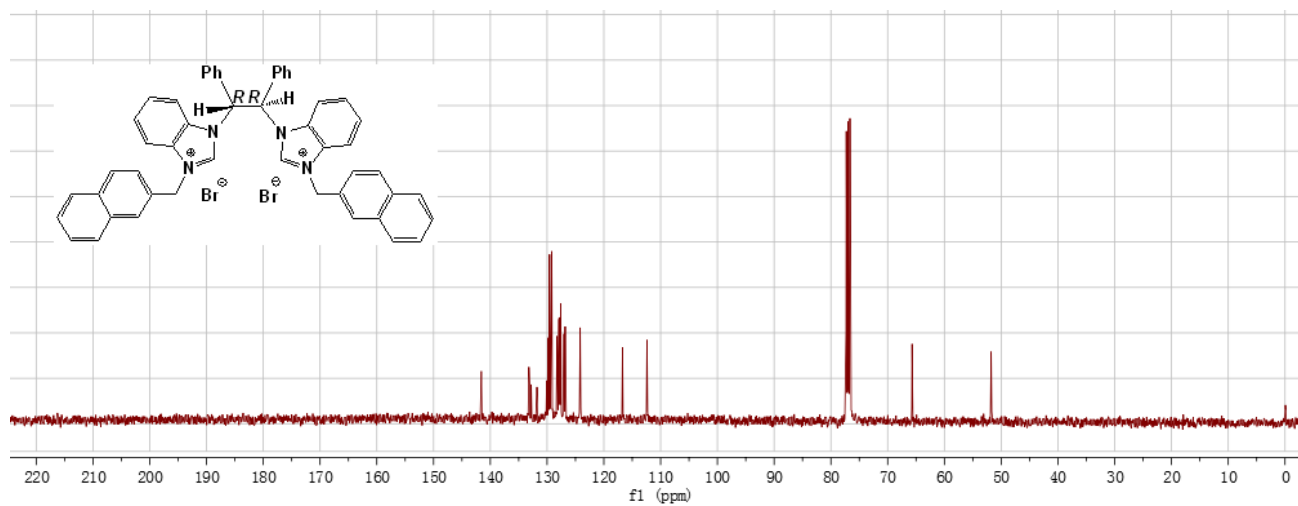

Figure S47. The  $^{13}\text{C}$  NMR spectrum of (*R,R*)-**18** in  $\text{CDCl}_3$  at  $20\text{ }^\circ\text{C}$

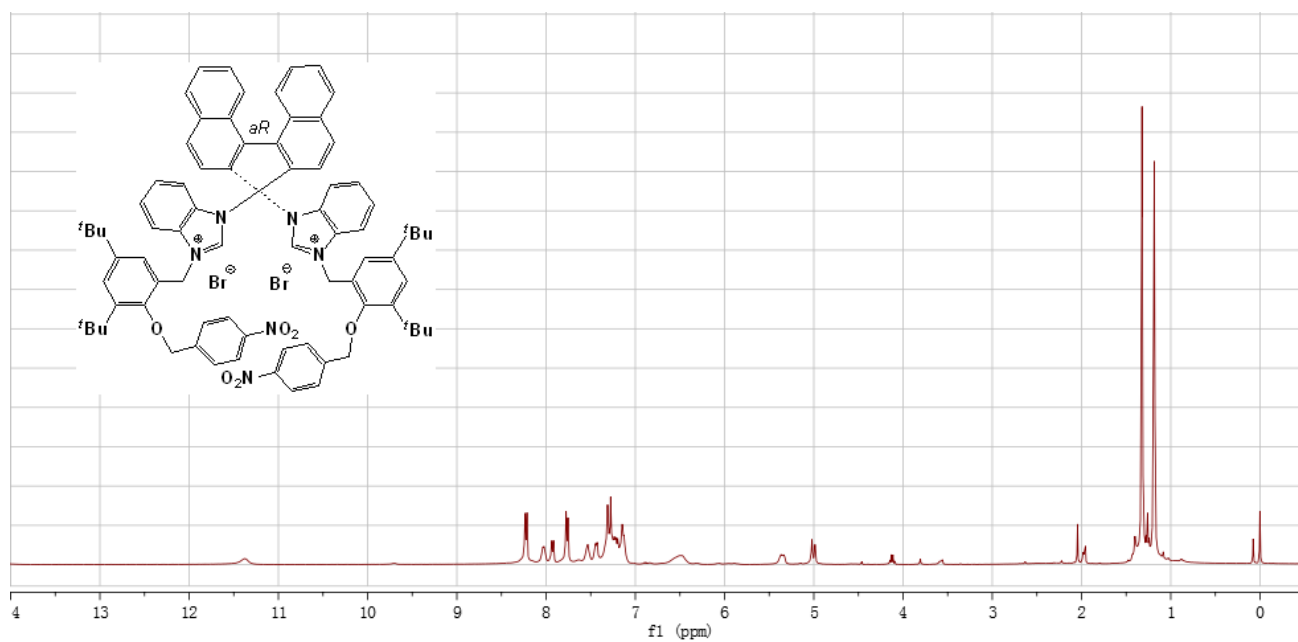

Figure S48. The  $^1\text{H}$  NMR spectrum of (*aR*)-**19** in  $\text{CDCl}_3$  at  $20\text{ }^\circ\text{C}$

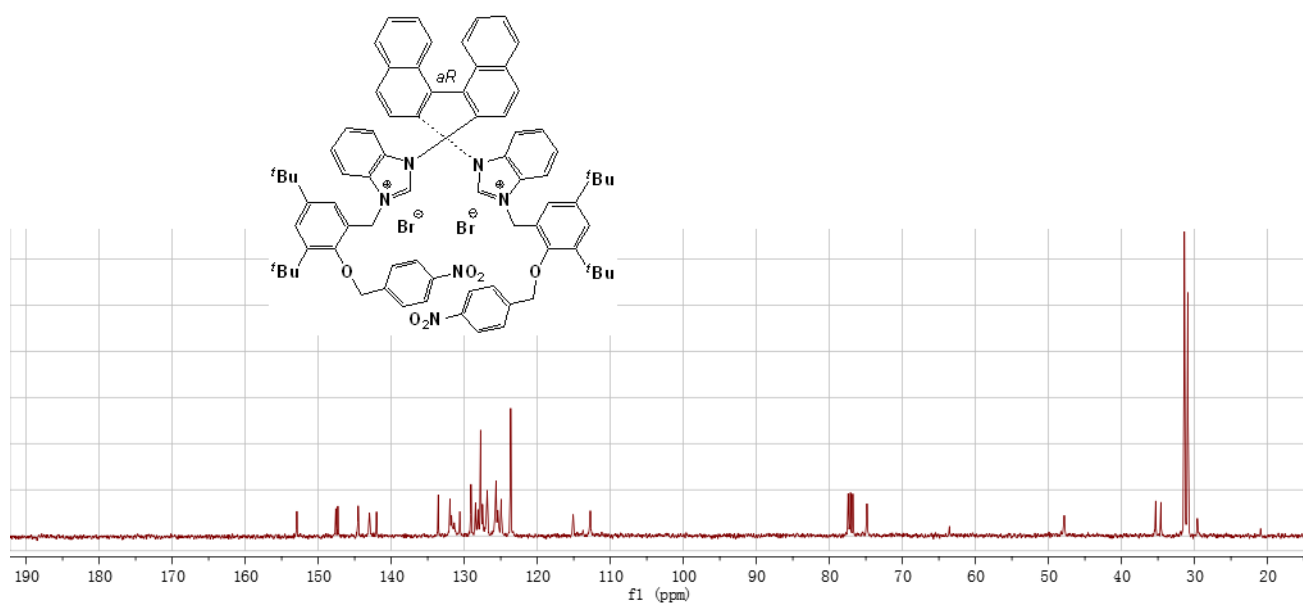

**Figure S49.** The  $^{13}\text{C}$  NMR spectrum of (*aR*)-**19** in  $\text{CDCl}_3$  at  $20\text{ }^\circ\text{C}$

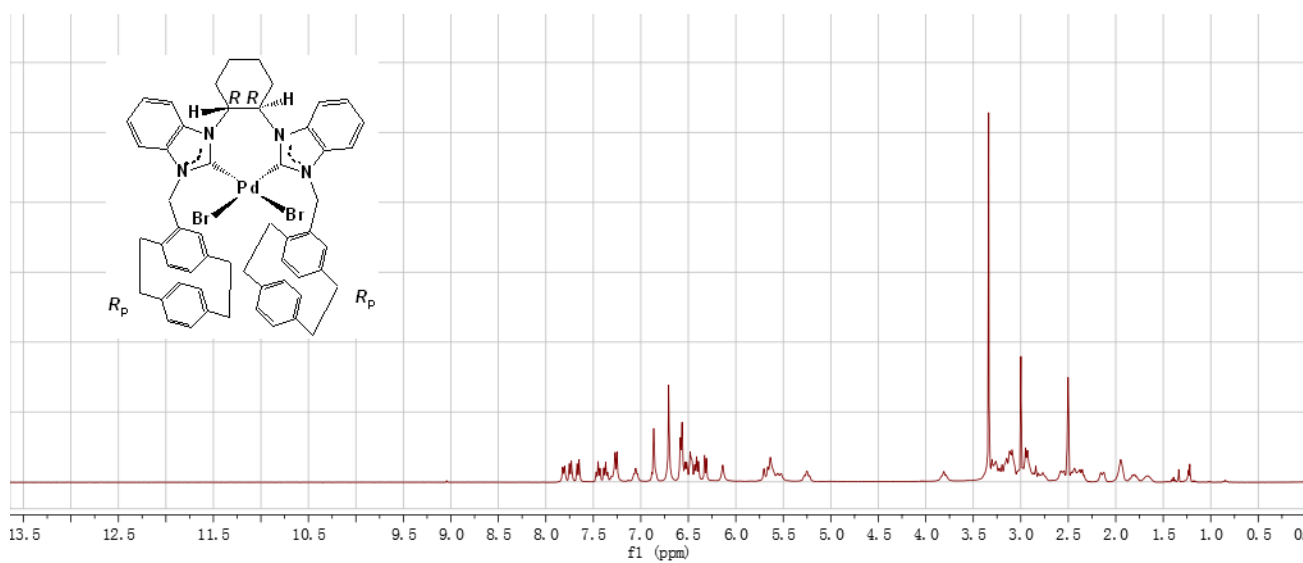

**Figure S50.** The  $^1\text{H}$  NMR spectrum of (*R,R,R<sub>p</sub>,R<sub>p</sub>*)-**21** in  $(\text{CD}_3)_2\text{SO}$  at  $20\text{ }^\circ\text{C}$

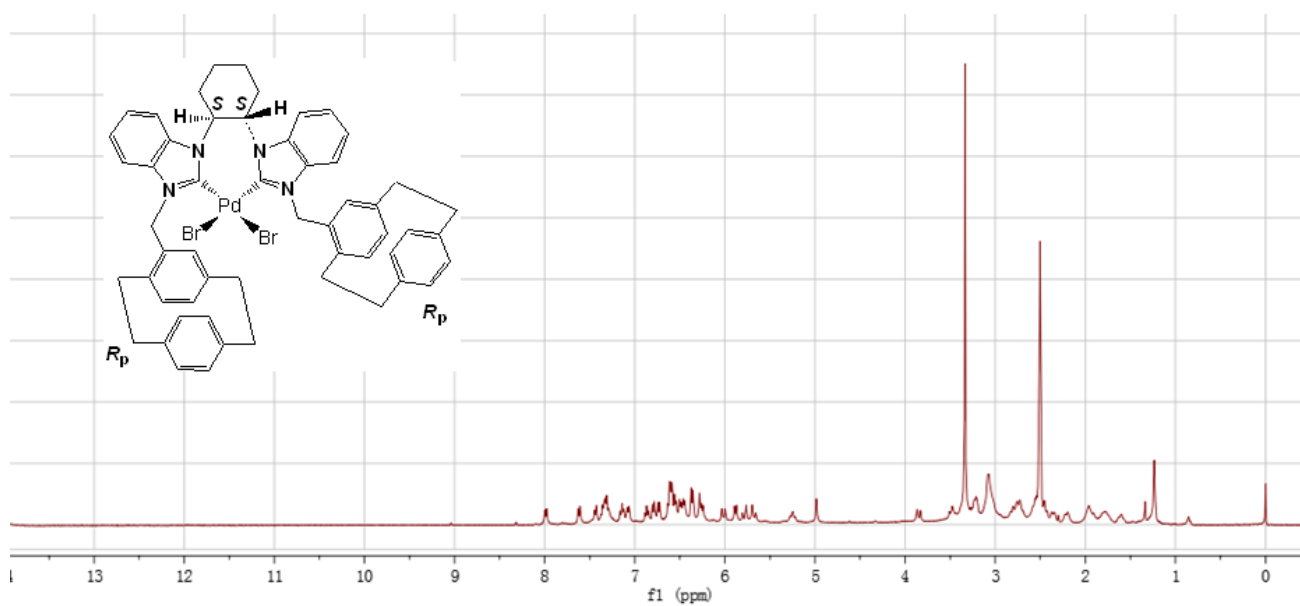

Figure S51. The  $^1\text{H}$  NMR spectrum of  $(R,R,R_p,R_p)$ -**21** in  $(\text{CD}_3)_2\text{SO}$  at  $20^\circ\text{C}$

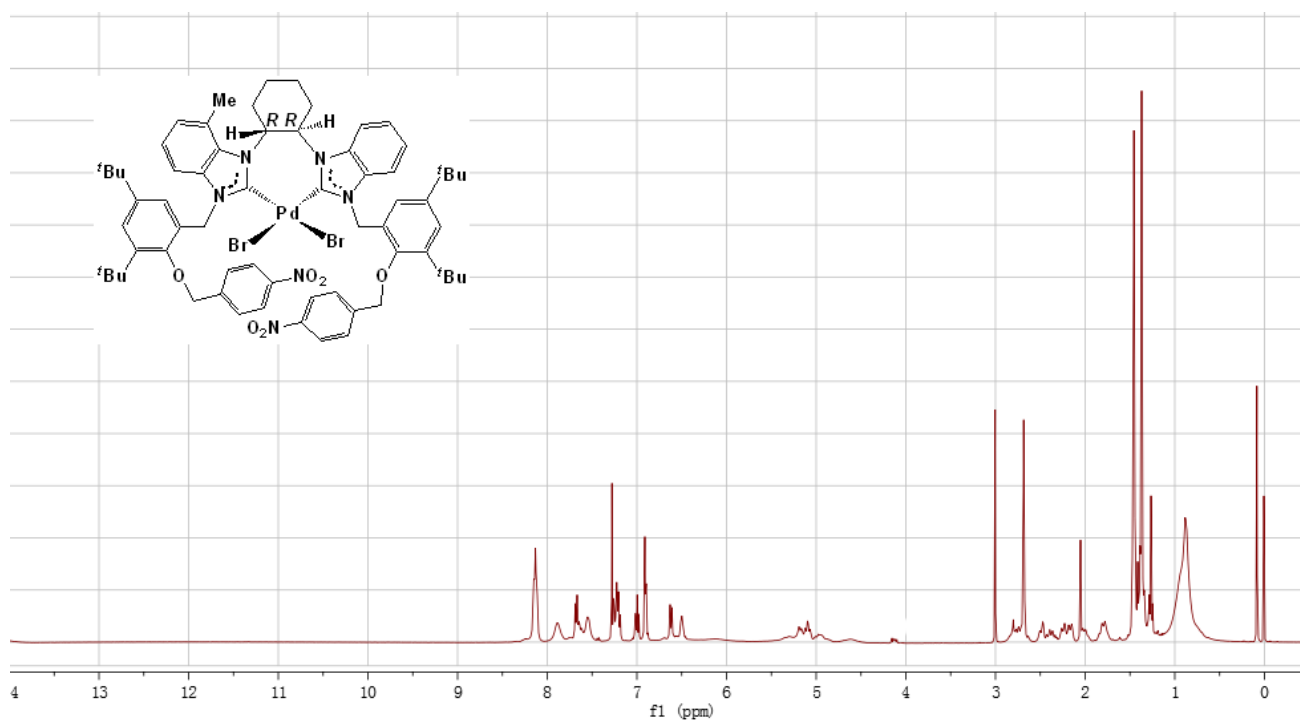

Figure S52. The  $^1\text{H}$  NMR spectrum of  $(R,R)$ -**22** in  $\text{CDCl}_3$  at  $20^\circ\text{C}$

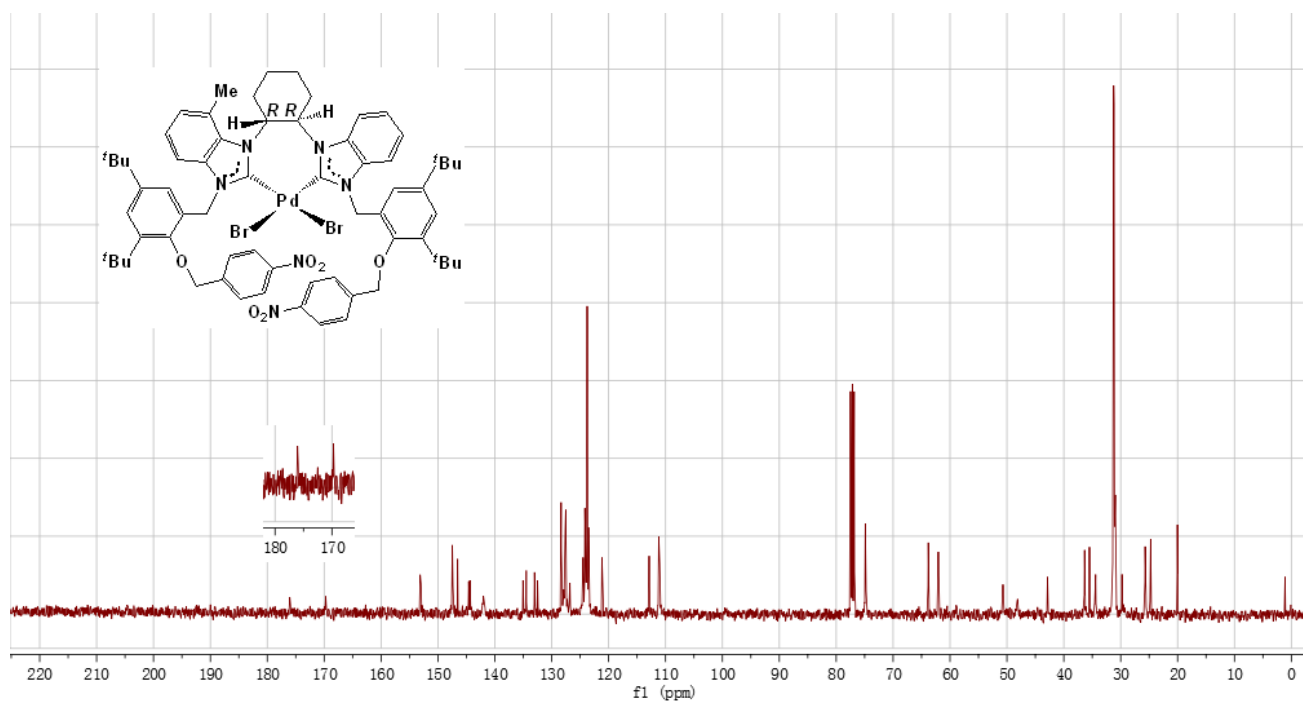

Figure S53. The  $^{13}\text{C}$  NMR spectrum of (*R,R*)-**22** in  $\text{CDCl}_3$  at  $20\text{ }^\circ\text{C}$

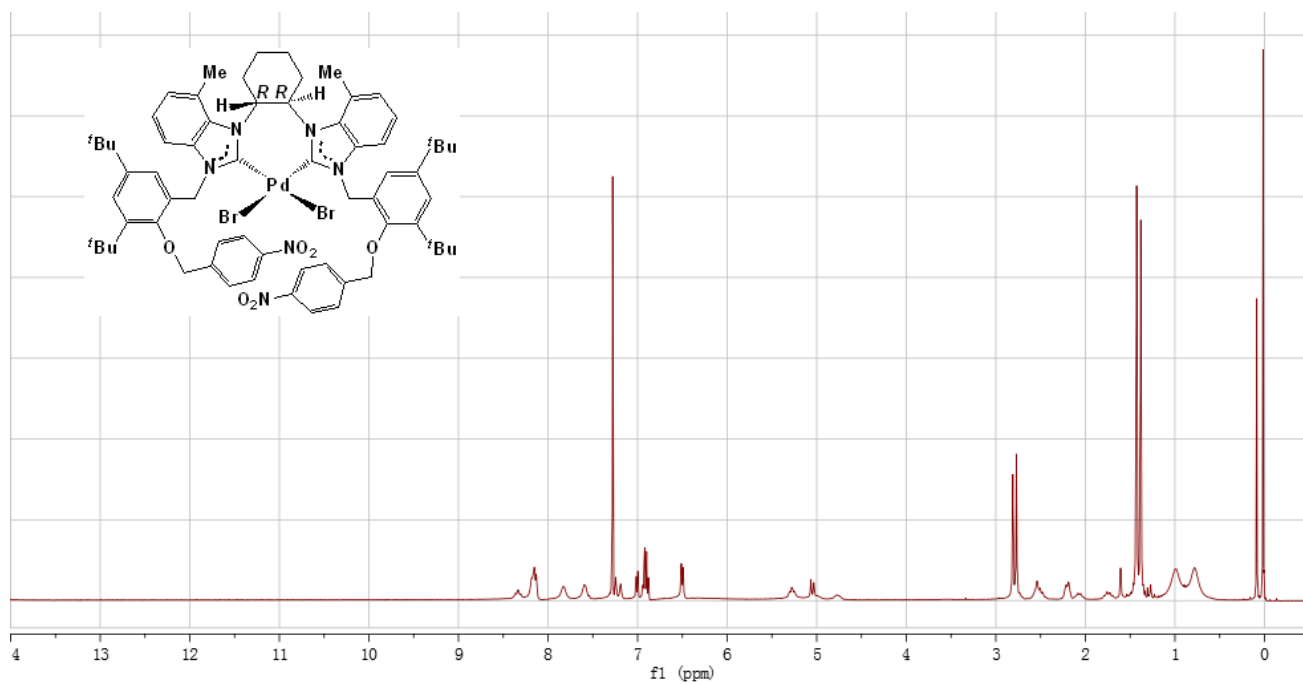

Figure S54. The  $^1\text{H}$  NMR spectrum of (*R,R*)-**23** in  $\text{CDCl}_3$  at  $20\text{ }^\circ\text{C}$

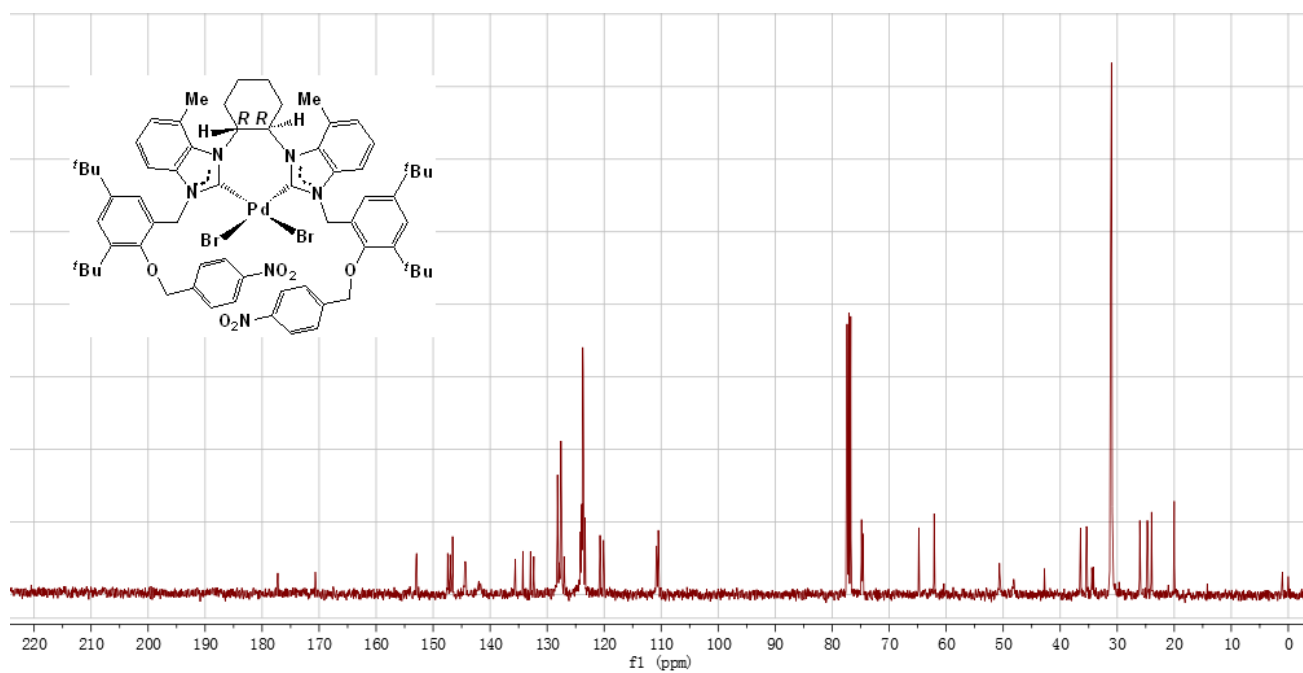

Figure S55. The  $^{13}\text{C}$  NMR spectrum of  $(R,R)$ -**23** in  $\text{CDCl}_3$  at  $20^\circ\text{C}$

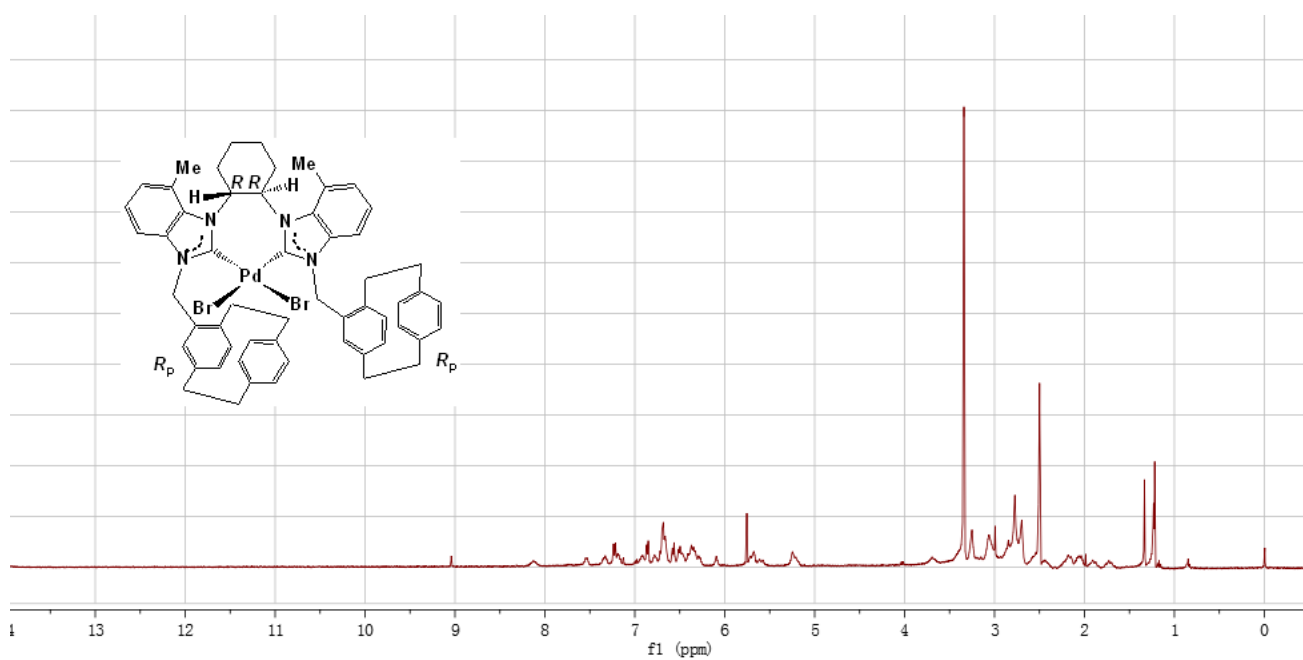

Figure S56. The  $^1\text{H}$  NMR spectrum of  $(R,R,R_p,R_p)$ -**24** in  $(\text{CD}_3)_2\text{SO}$  at  $20^\circ\text{C}$



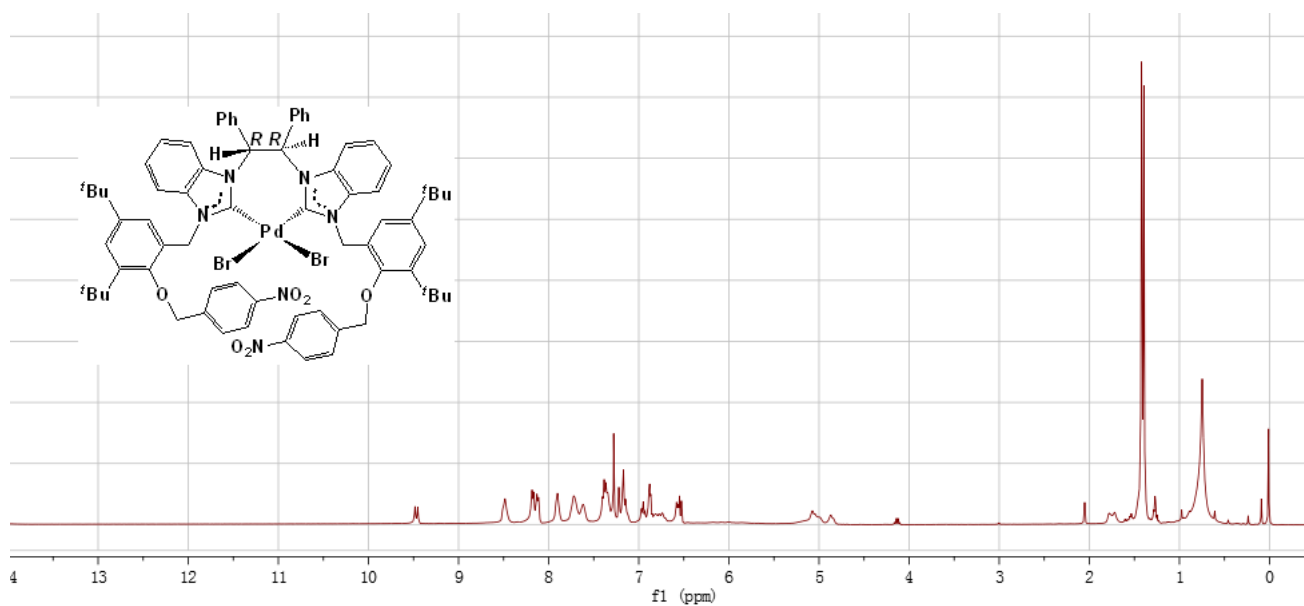

Figure S57. The  $^1\text{H}$  NMR spectrum of  $(R,R,R_p,R_p)$ -**25** in  $\text{CDCl}_3$  at  $20^\circ\text{C}$

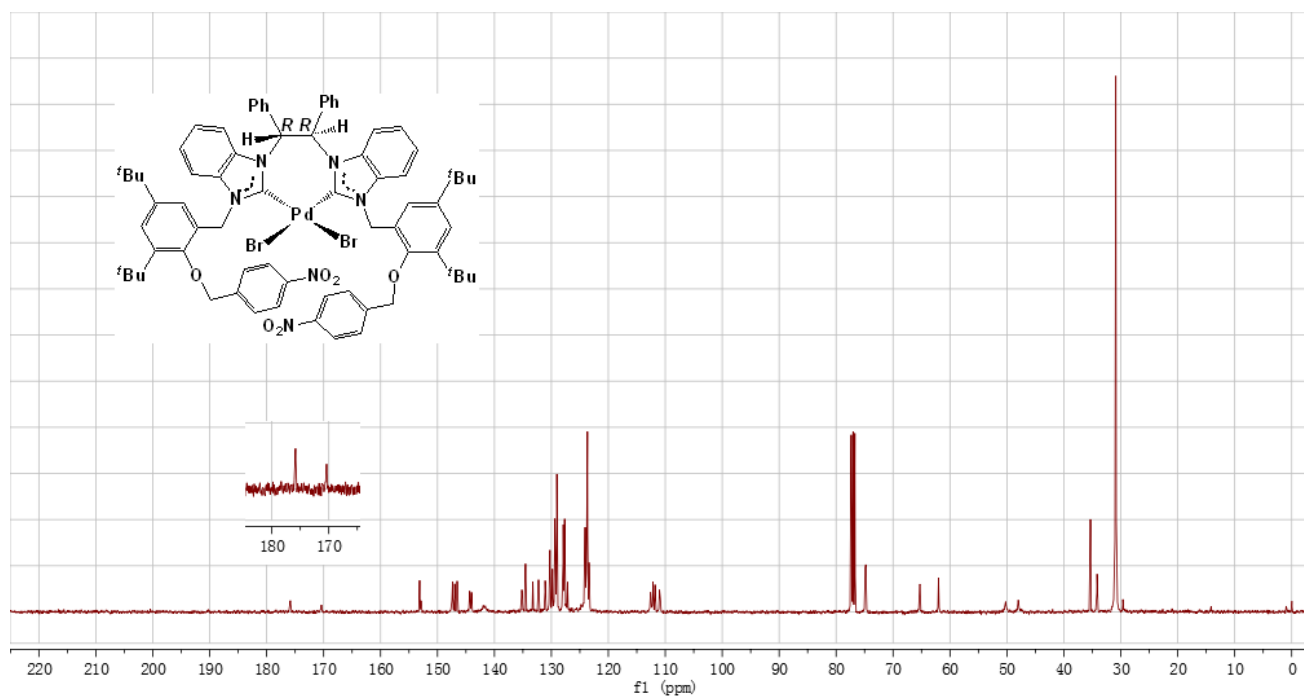

Figure S58. The  $^{13}\text{C}$  NMR spectrum of  $(R,R)$ -**25** in  $\text{CDCl}_3$  at  $20^\circ\text{C}$

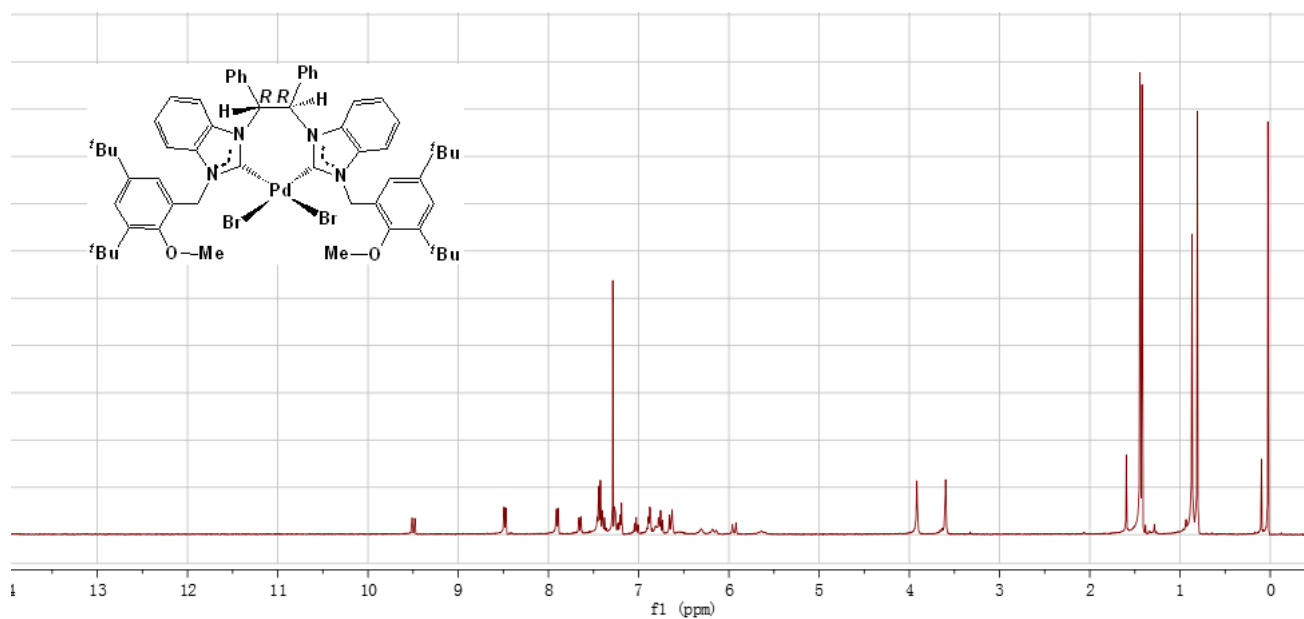

Figure S59. The  $^1\text{H}$  NMR spectrum of (*R,R*)-**26** in  $\text{CDCl}_3$  at 20 °C

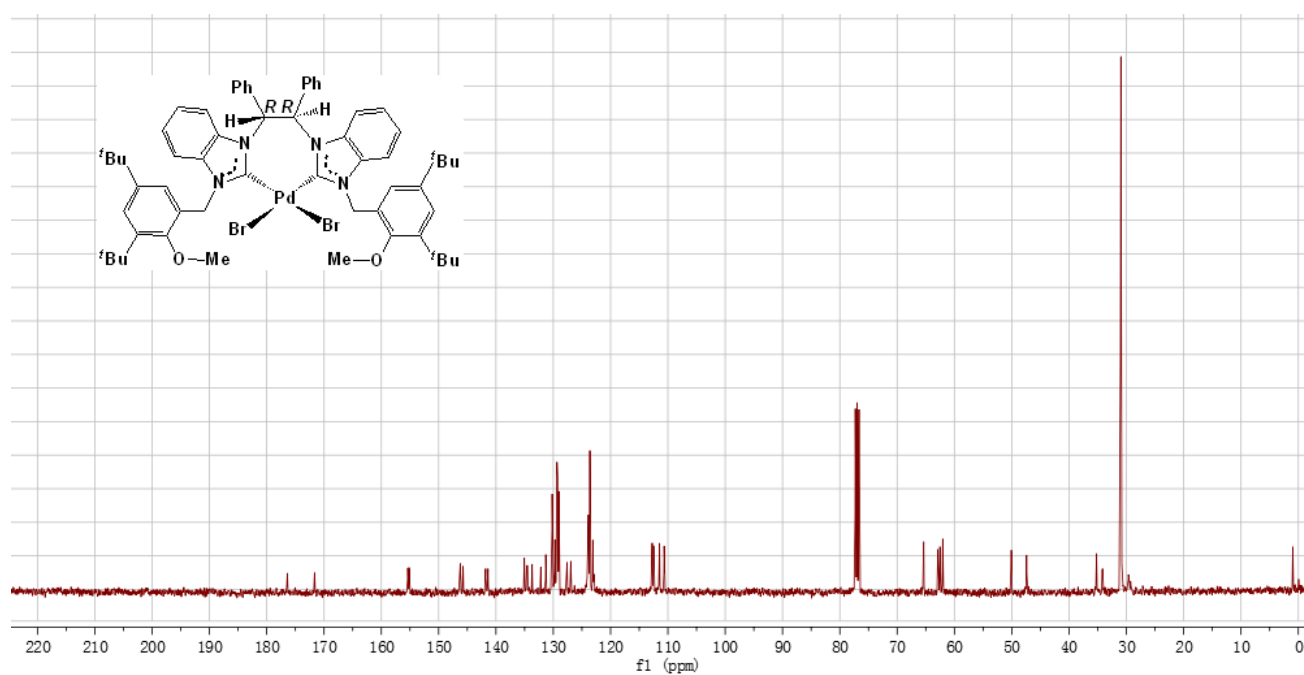

Figure S60. The  $^{13}\text{C}$  NMR spectrum of (*R,R*)-**26** in  $\text{CDCl}_3$  at 20 °C

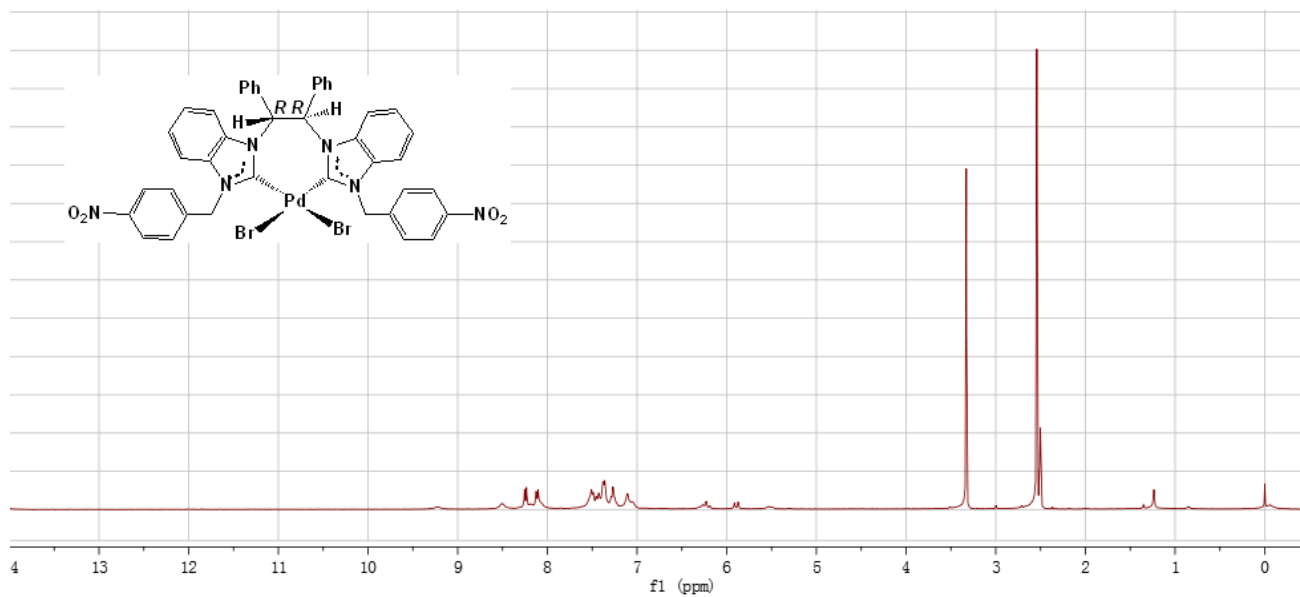

Figure S61. The  $^1\text{H}$  NMR spectrum of (*R,R*)-**27** in  $(\text{CD}_3)_2\text{SO}$  at 20 °C

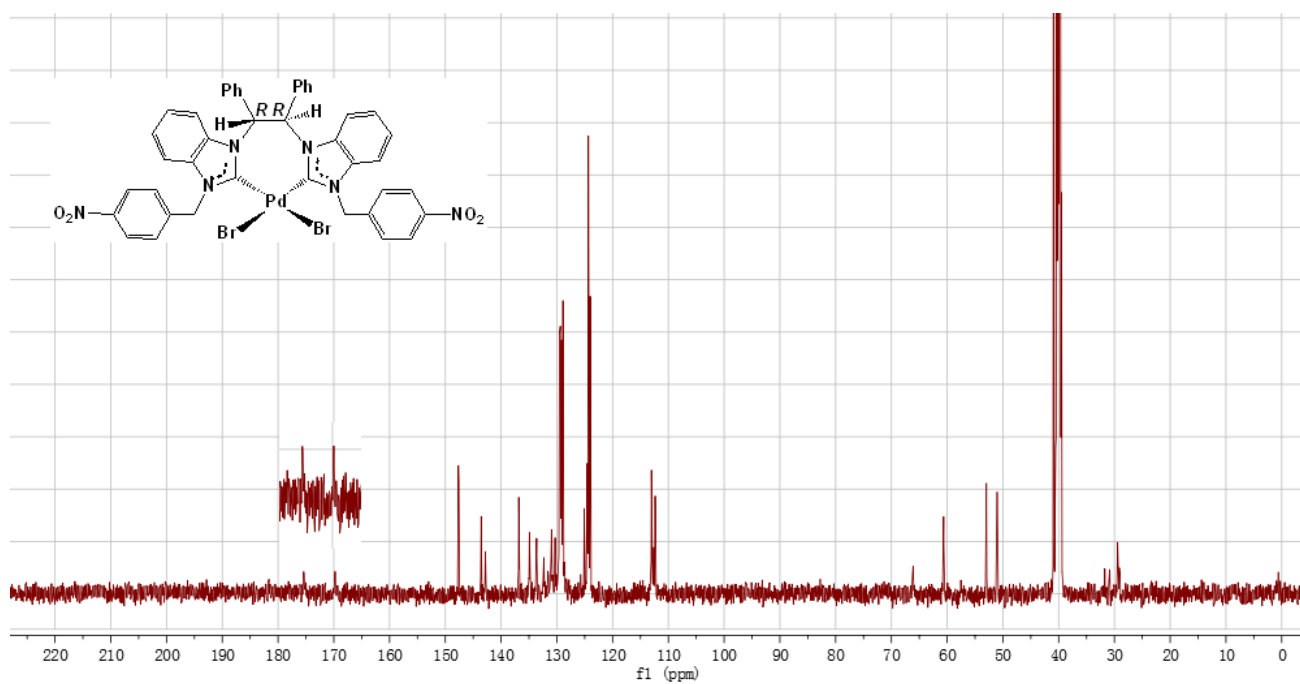

Figure S62. The  $^{13}\text{C}$  NMR spectrum of (*R,R*)-**27** in  $(\text{CD}_3)_2\text{SO}$  at 20 °C

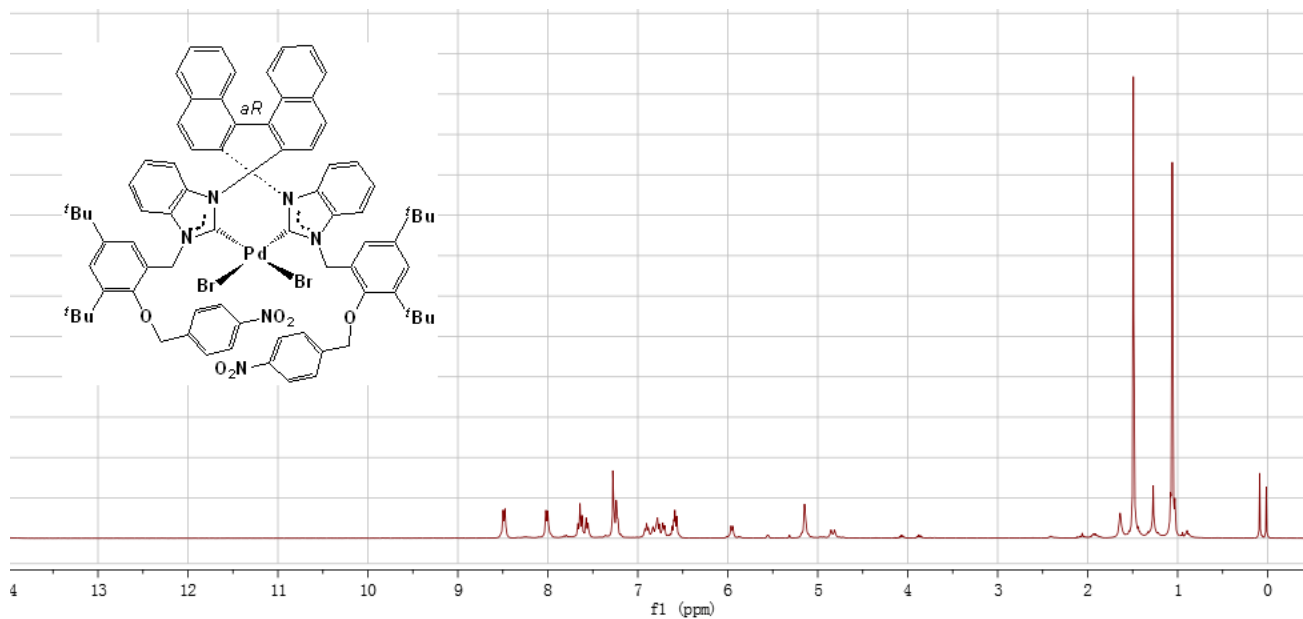

Figure S63. The  $^1\text{H}$  NMR spectrum of (*aR*)-**28** in  $\text{CDCl}_3$  at  $20\text{ }^\circ\text{C}$

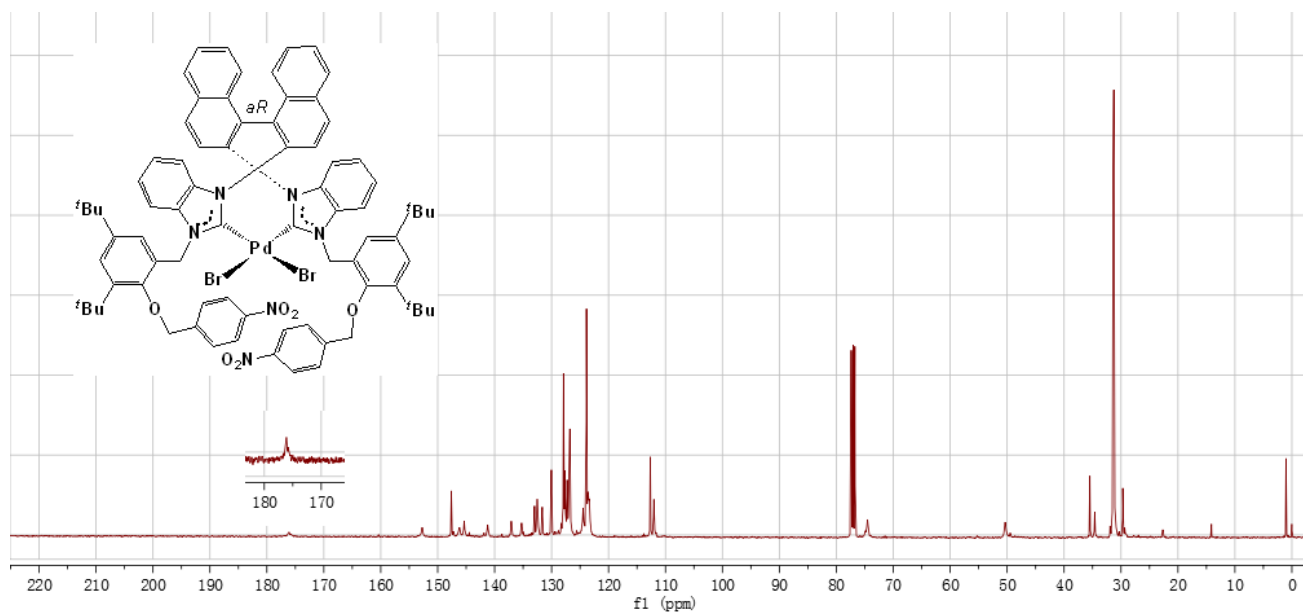

Figure S64. The  $^{13}\text{C}$  NMR spectrum of (*aR*)-**28** in  $\text{CDCl}_3$  at  $20\text{ }^\circ\text{C}$

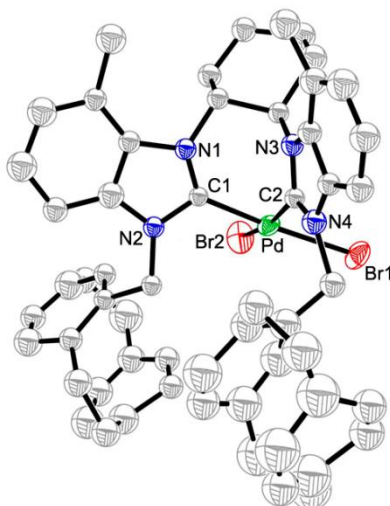

**Figure S65.** Molecular structure of  $(R,R,R_p,R_p)$ -**24** with ellipsoids drawn at the 50% probability level. All hydrogen atoms and *tert*-butyl groups are omitted for clarity. Selected bond distances (Å) and bond angles (deg): Pd–C(1) = 1.97(2), Pd–C(2) = 1.99(2), Pd–Br(2) = 2.448(4), Pd–Br(1) = 2.452(4), C(1)–Pd–C(2) = 85.8(10) C(2)–Pd–Br(1) = 90.8(7), C(1)–Pd–Br(2) = 90.2(7), Br(1)–Pd–Br(2) = 92.66(14), C(1)–Pd–Br(1) = 168.2(6), C(2)–Pd–Br(2) = 175.5(7).

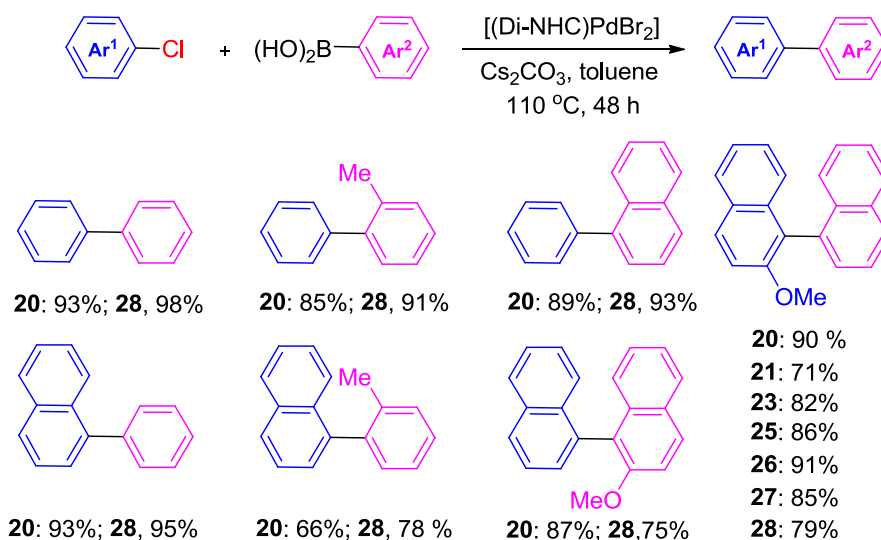

**Figure S66.** Cross Coupling Reactions of Aryl Chlorides and Boronic Acids. Conditions: Aryl chlorides (0.5 mmol), boronic (0.75 mmol), catalyst [Pd] (3 mol %), Cs<sub>2</sub>CO<sub>3</sub> (1.2 mmol), 110 °C for 24 h. The reaction condition has not been optimized. Isolated yields are given after by chromatography on silica gel, as an average of two runs.

**Table S1. Crystal data and structure refinement for complex (R,R,R<sub>p</sub>,R<sub>p</sub>)-24**

---

|                                   |                                                                   |                  |
|-----------------------------------|-------------------------------------------------------------------|------------------|
| Identification code               | a50928b                                                           |                  |
| Empirical formula                 | C <sub>20</sub> H <sub>20</sub> Br <sub>2</sub> N <sub>4</sub> Pd |                  |
| Formula weight                    | 582.62                                                            |                  |
| Temperature                       | 293(2) K                                                          |                  |
| Wavelength                        | 0.71073 Å                                                         |                  |
| Crystal system                    | Monoclinic                                                        |                  |
| Space group                       | P 21                                                              |                  |
| Unit cell dimensions              | a = 10.948(7) Å                                                   | α = 90°.         |
|                                   | b = 25.212(15) Å                                                  | β = 104.246(8)°. |
|                                   | c = 20.031(12) Å                                                  | γ = 90°.         |
| Volume                            | 5359(6) Å <sup>3</sup>                                            |                  |
| Z                                 | 8                                                                 |                  |
| Density (calculated)              | 1.444 Mg/m <sup>3</sup>                                           |                  |
| Absorption coefficient            | 3.684 mm <sup>-1</sup>                                            |                  |
| F(000)                            | 2272                                                              |                  |
| Crystal size                      | 0.540 x 0.060 x 0.060 mm <sup>3</sup>                             |                  |
| Theta range for data collection   | 1.324 to 25.099°.                                                 |                  |
| Index ranges                      | -12<=h<=13, -30<=k<=21, -23<=l<=22                                |                  |
| Reflections collected             | 23100                                                             |                  |
| Independent reflections           | 12266 [R(int) = 0.1035]                                           |                  |
| Completeness to theta = 25.242°   | 96.1 %                                                            |                  |
| Absorption correction             | None                                                              |                  |
| Refinement method                 | Full-matrix least-squares on F <sup>2</sup>                       |                  |
| Data / restraints / parameters    | 12266 / 1 / 619                                                   |                  |
| Goodness-of-fit on F <sup>2</sup> | 0.994                                                             |                  |
| Final R indices [I>2sigma(I)]     | R1 = 0.1072, wR2 = 0.2664                                         |                  |
| R indices (all data)              | R1 = 0.2039, wR2 = 0.3261                                         |                  |
| Absolute structure parameter      | 0.14(2)                                                           |                  |
| Extinction coefficient            | n/a                                                               |                  |
| Largest diff. peak and hole       | 1.118 and -1.178 e.Å <sup>-3</sup>                                |                  |

---
